# Supplementary material for: Synthesis of O-benzyl hydroxamates employing the sulfonate esters of N-hydroxybenzotriazole
Source: Royal Society of Chemistry journal article supplement (doi:10.1039/c3ra44294b), 2013-11-07
Supplement: c3ra44294b.pdf [file c3ra44294b.pdf]

## Synthesis of *O*-Benzyl Hydroxamates Employing the Sulfonate Esters of *N*-Hydroxybenzotriazole

Nani Babu Palakurthy, Dharm Dev, Sonali Paikaray, Susmitnarayan Chaudhury, Bhubaneswar Mandal\*

Department of Chemistry, Indian Institute of technology Guwahati, Guwahati, Assam, India

Tel: 0361-2582319; E-mail: [bmandal@iitg.ernet.in](mailto:bmandal@iitg.ernet.in)

### Supporting Information

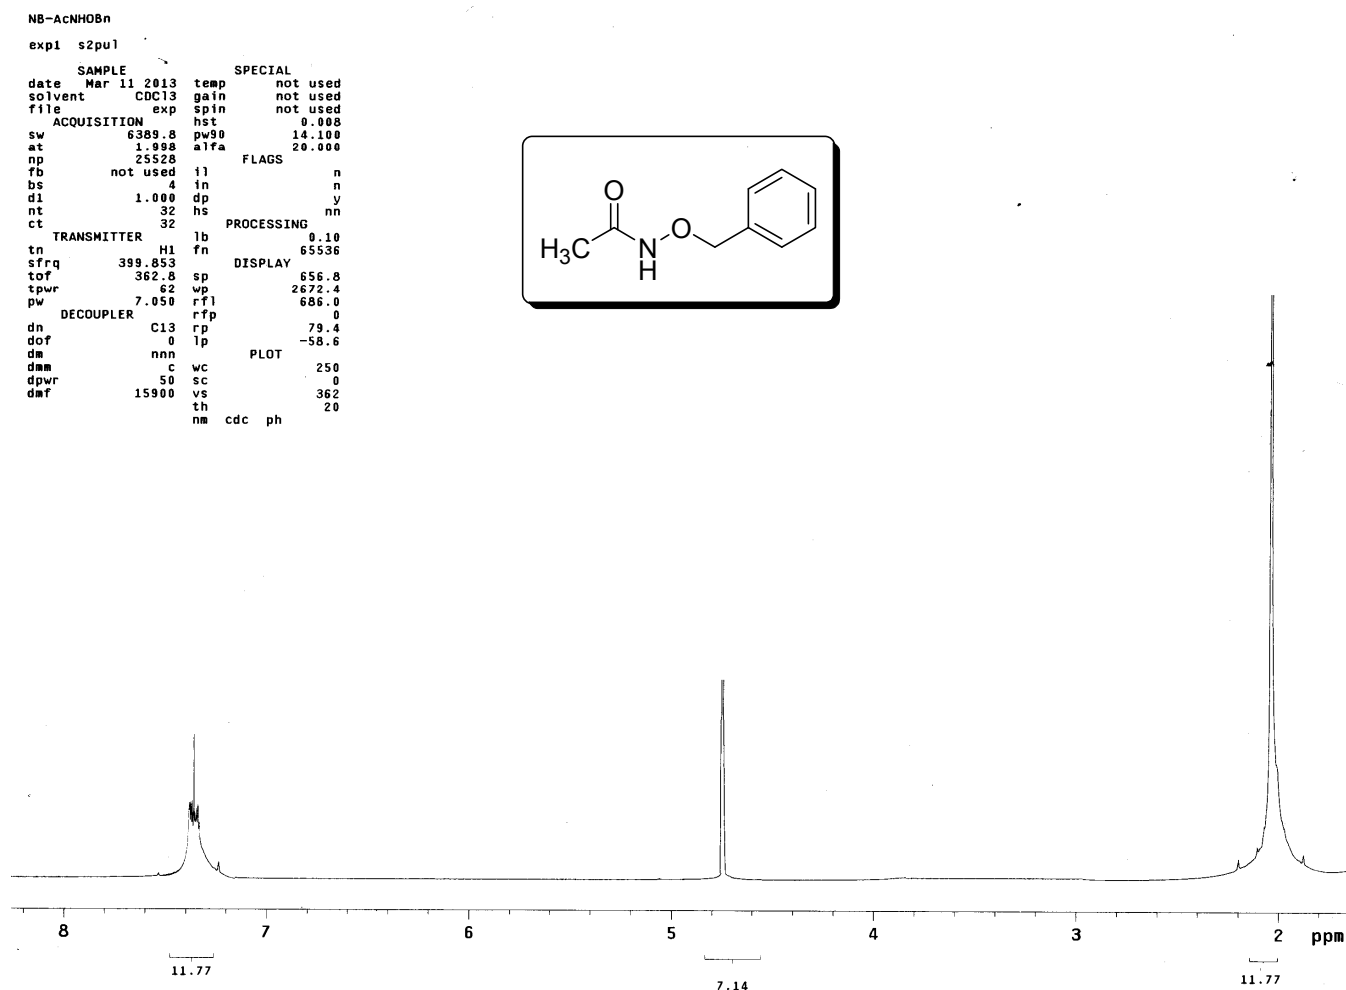

Figure S1. <sup>1</sup>H NMR spectra of Ac-NHOBn (entry 1, table 2)

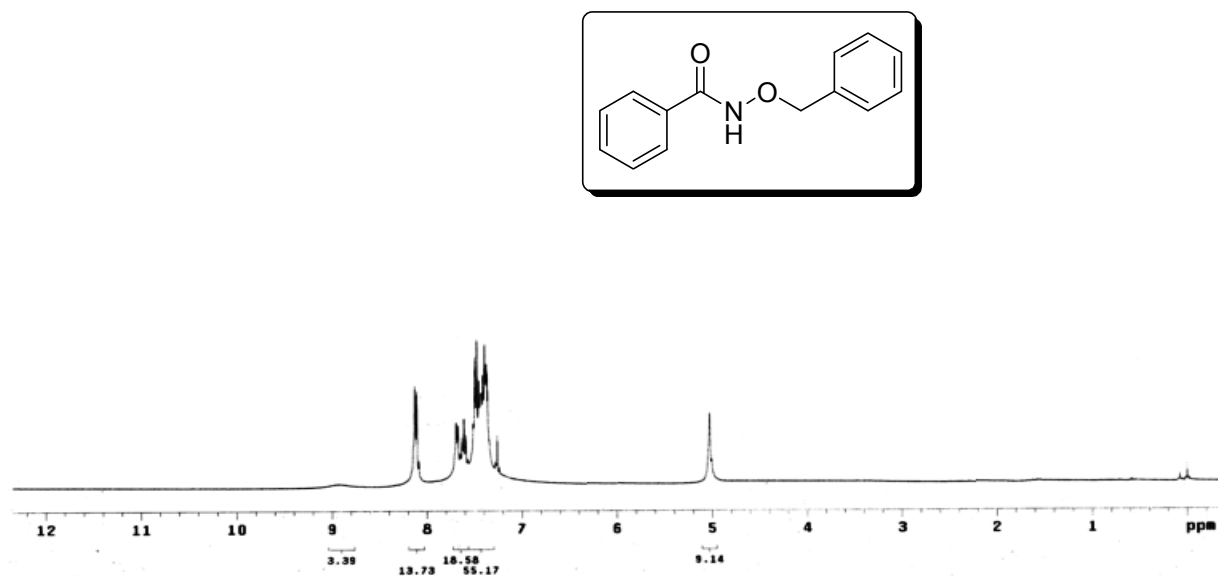

Figure S2. <sup>1</sup>H NMR spectra of BzCONHOBn (entry 2, table 2)

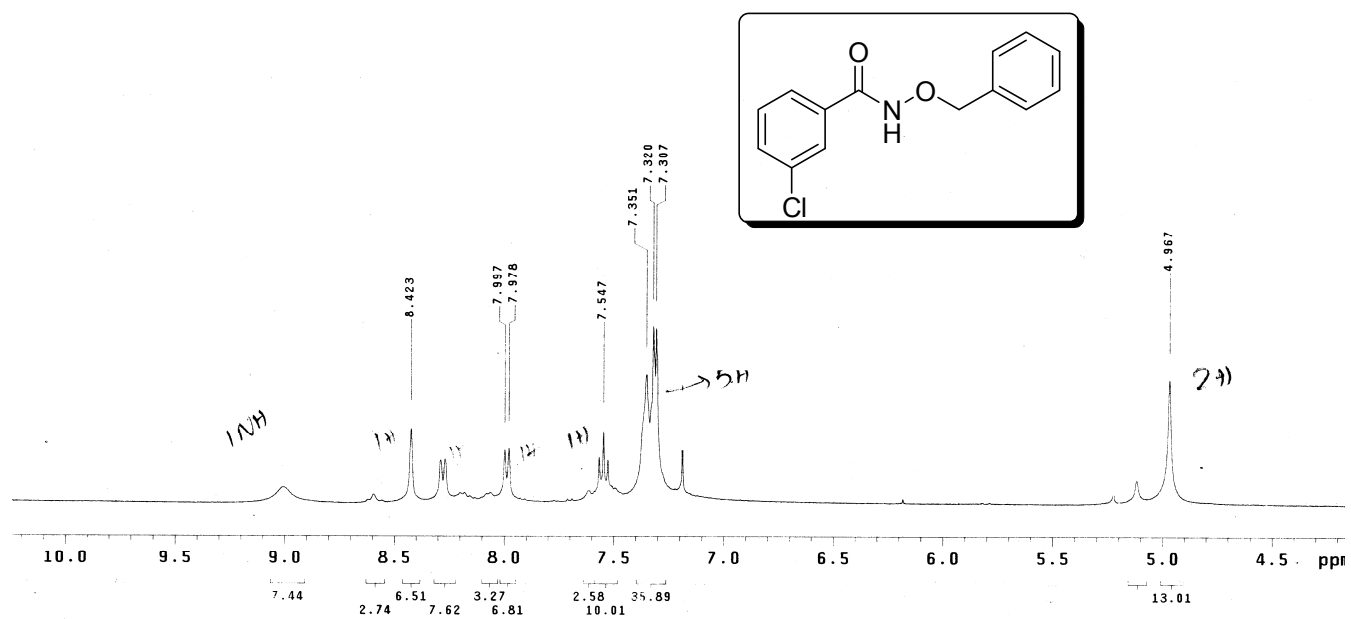

Figure S3. <sup>1</sup>H NMR spectra of *m*-Cl<sub>2</sub>-C<sub>6</sub>H<sub>4</sub>-CONHOBn (entry 3, table 2)

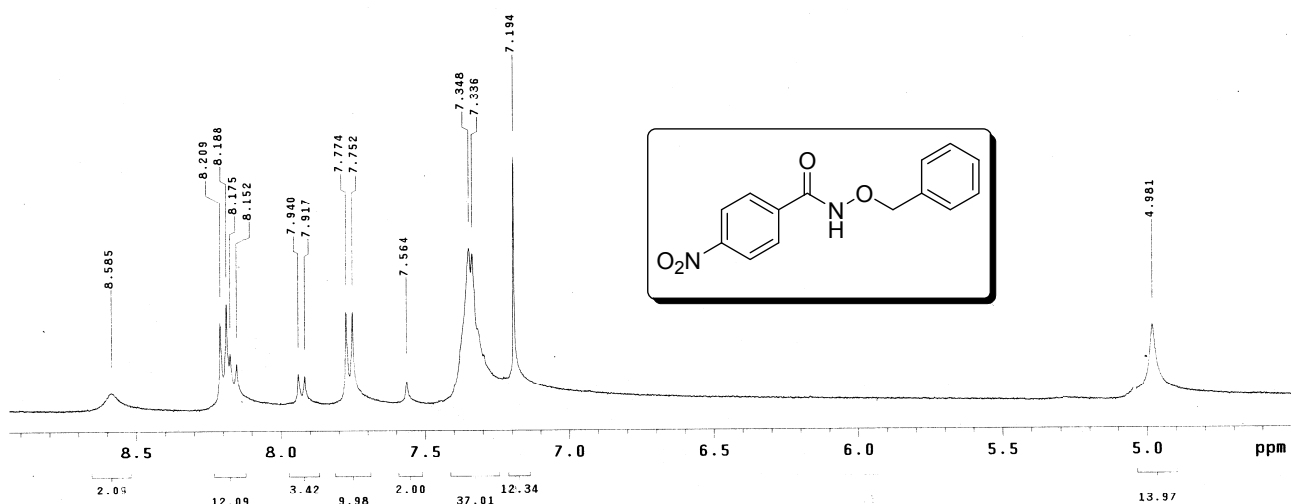

Figure S4. <sup>1</sup>H NMR spectra of *p*-NO<sub>2</sub>-C<sub>6</sub>H<sub>4</sub>-CONHOBn (entry 4, table 2)

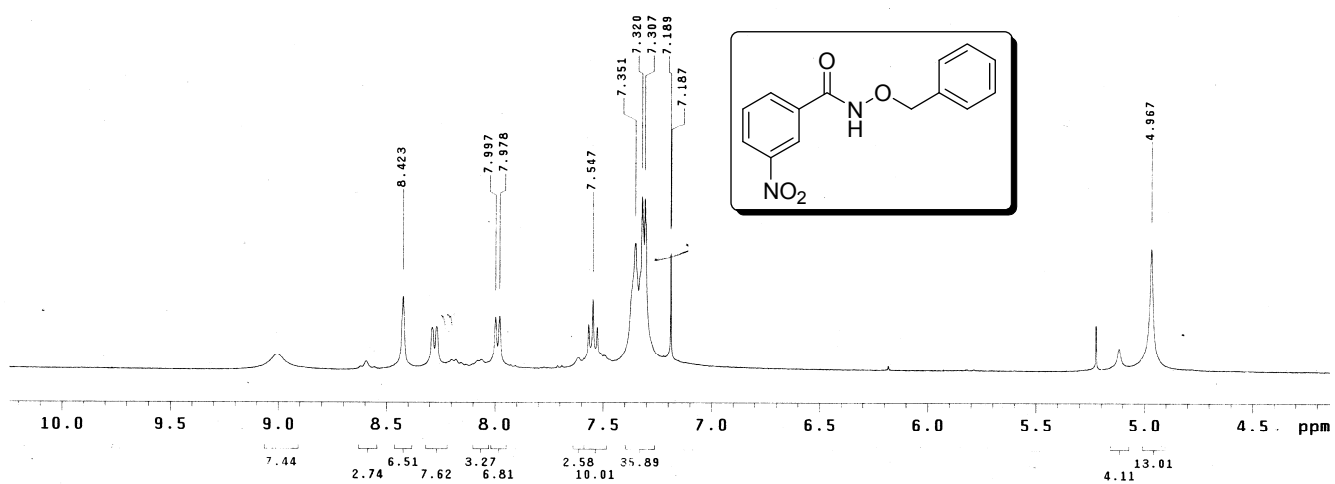

Figure S5. <sup>1</sup>H NMR spectra of *m*-NO<sub>2</sub>-C<sub>6</sub>H<sub>4</sub>-CONHOBn (entry 5, table 2)

```

NB-S-1077-T3
expl s2pu1

SAMPLE SPECIAL
date Jun 9 2012 temp not used
solvent CDCl3 gain not used
file exp spin not used
ACQUISITION hst 0.000
sw 6389.8 pu80 19.700
at 1.990 alfa 20.000
np 2550
fb not used fl FLAGS n
bs 4 in n
d1 1.000 dp y
nt 32 hs nn
ct 32 PROCESSING 0.10
tn TRANSMITTER H1 fn 65536
sfrq 399.053 DISPLAY -345.0
tof 362.8 sp -470.0
tpr 57 wp 790.4
pw 9.050 rF1 0
DECOUPLER C13 rfp 167.3
dn 0 lp -91.5
dof nnn PLOT 250
dm c wc 0
dpr 50 sc 0
dof 15900 vs 77
nm cdc ph 20
    
```

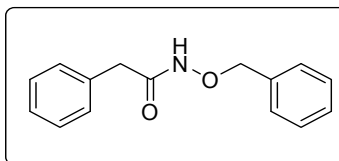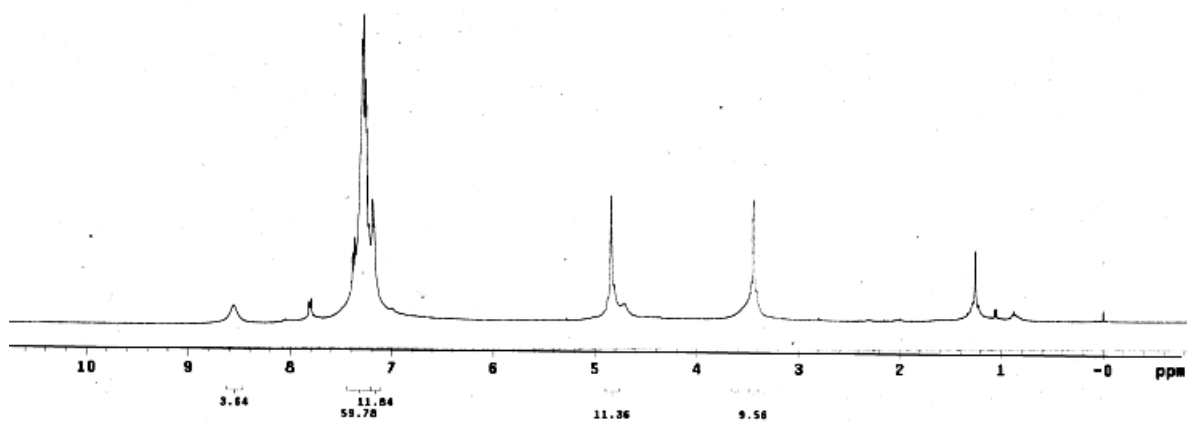

Figure S6.  $^1\text{H}$  NMR spectra of BnCONHOBn (entry 6, table 2)

```

NB-S-1119-T2
expl s2pu1

SAMPLE SPECIAL
date Jun 19 2012 temp not used
solvent CDCl3 gain not used
file exp spin not used
ACQUISITION hst 0.000
sw 6389.8 pu80 19.700
at 1.990 alfa 20.000
np 2550
fb not used fl FLAGS n
bs 4 in n
d1 1.000 dp y
nt 32 hs nn
ct 32 PROCESSING 0.10
tn TRANSMITTER H1 fn 65536
sfrq 399.053 DISPLAY -261.1
tof 362.8 sp -477.5
tpr 57 wp 790.0
pw 9.050 rF1 0
DECOUPLER C13 rfp 167.6
dn 0 lp -91.5
dof nnn PLOT 250
dm c wc 0
dpr 50 sc 0
dof 15900 vs 77
nm cdc ph 20
    
```

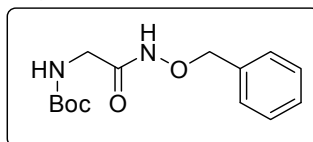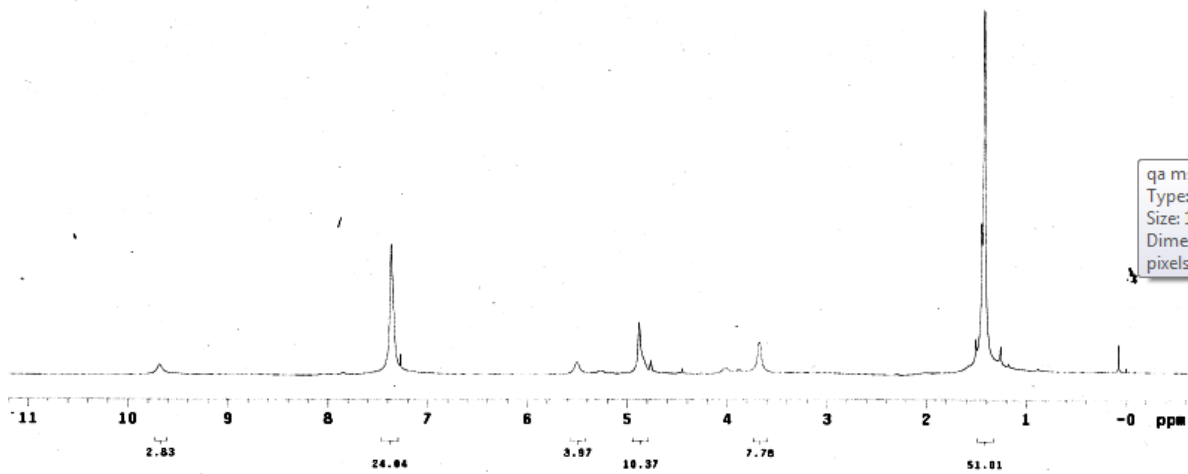

Figure S7.  $^1\text{H}$  NMR spectra of Boc-Gly-NHOBn (entry 7, table 2)

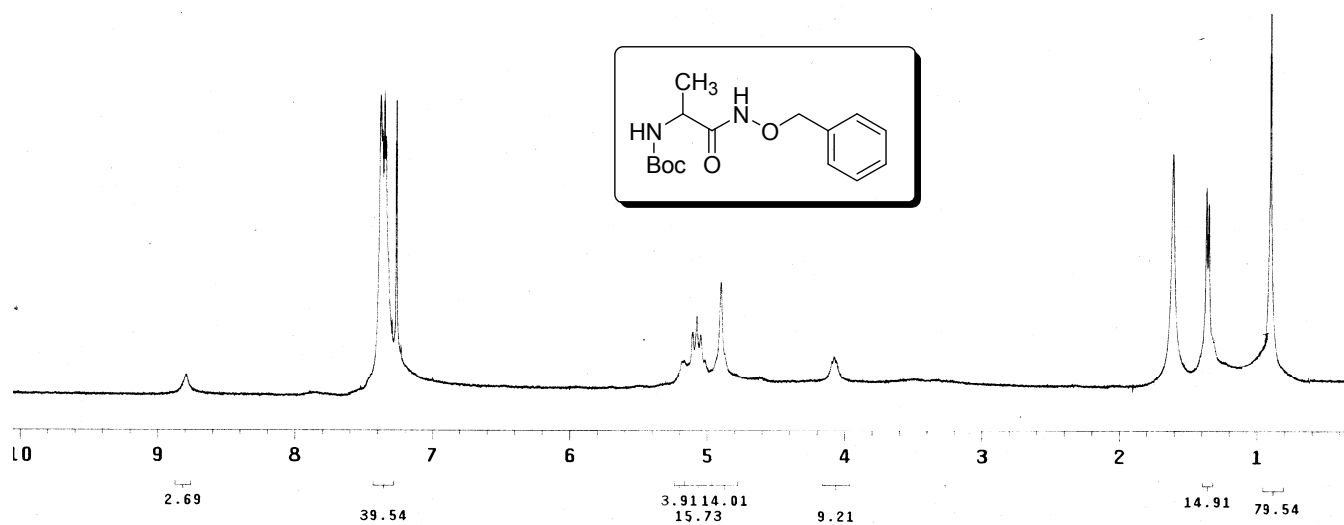

Figure S8. <sup>1</sup>H NMR spectra of Boc-Ala-NHOBn (entry 8, table 2)

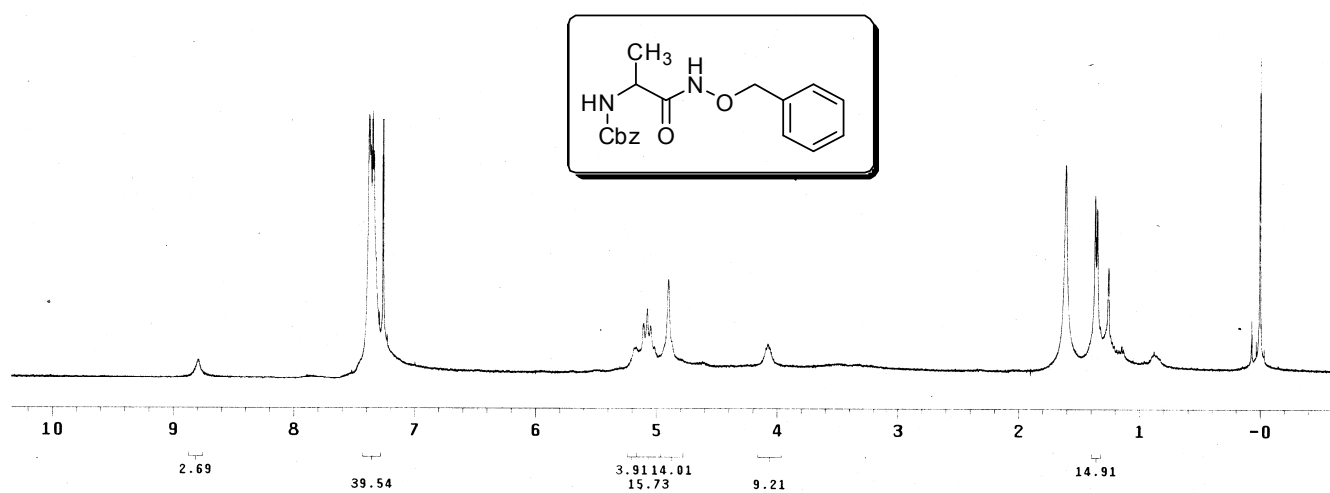

Figure S9. <sup>1</sup>H NMR spectra of Cbz-Ala-NHOBn (entry 9, table 2)

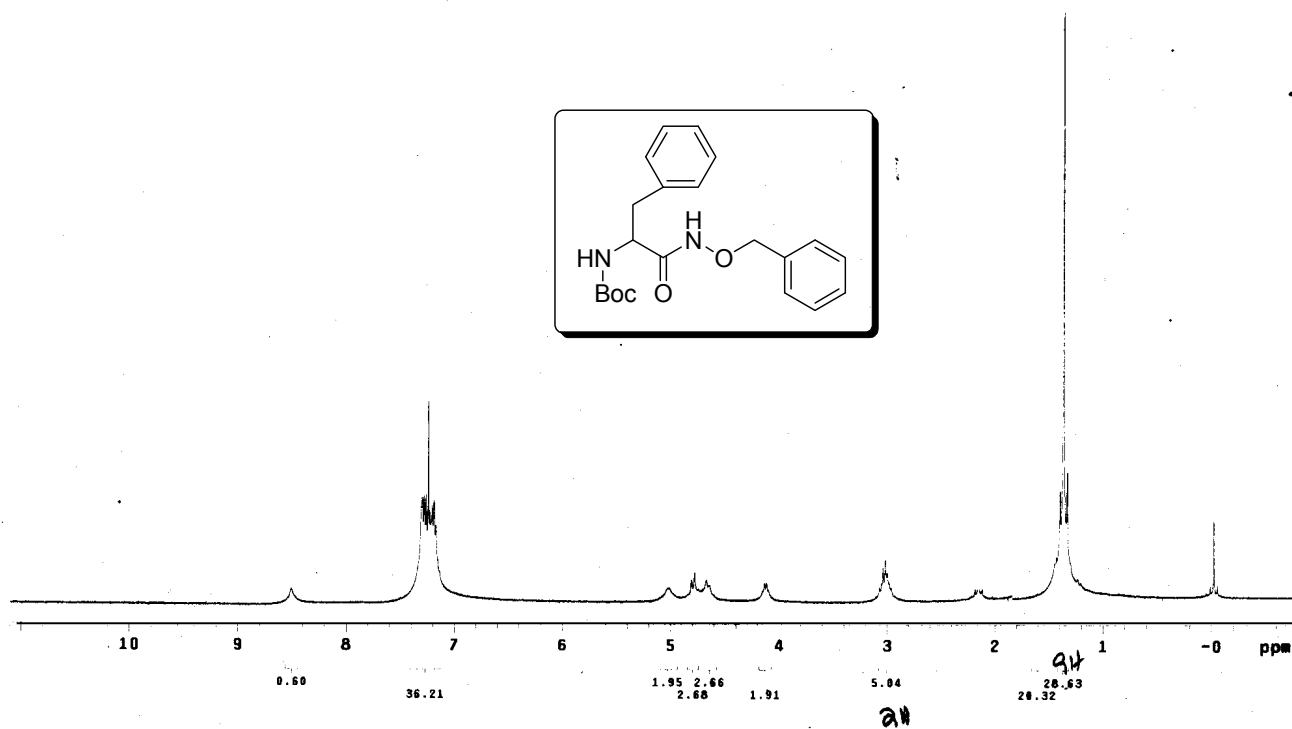

Figure S10. <sup>1</sup>H NMR spectra of Boc-Phe-NHOBn (entry 10, table 2)

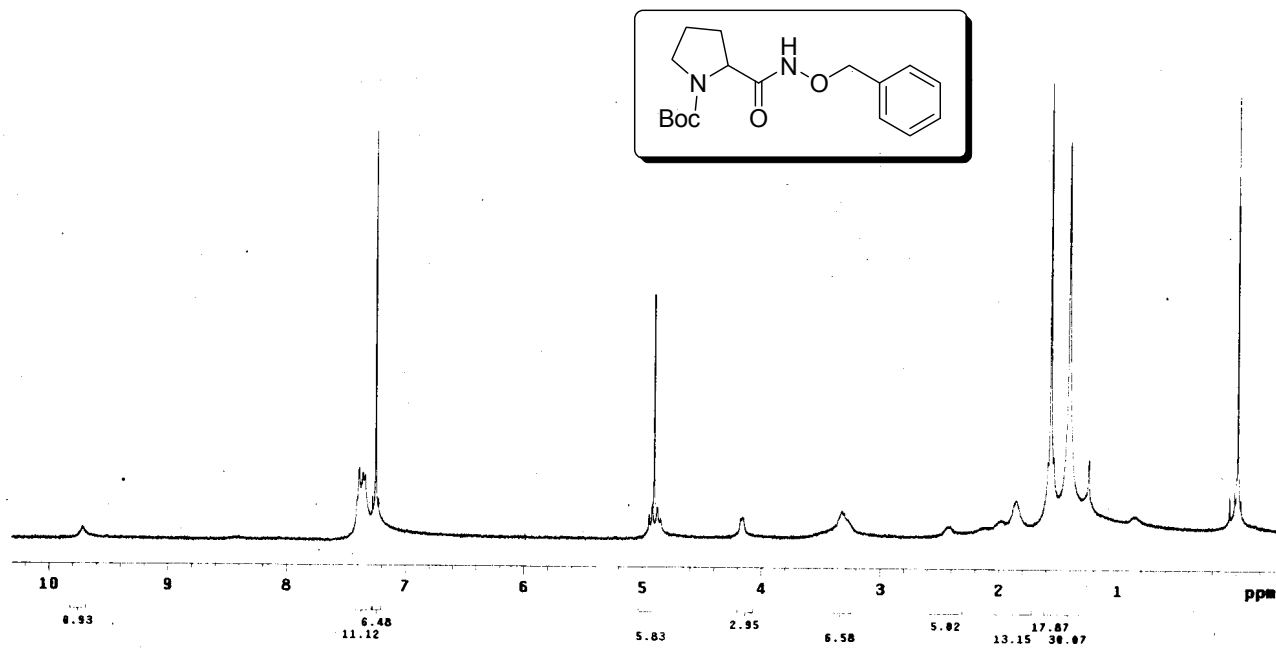

Figure S11. <sup>1</sup>H NMR spectra of Boc-Pro-NHOBn (entry 11, table 2)

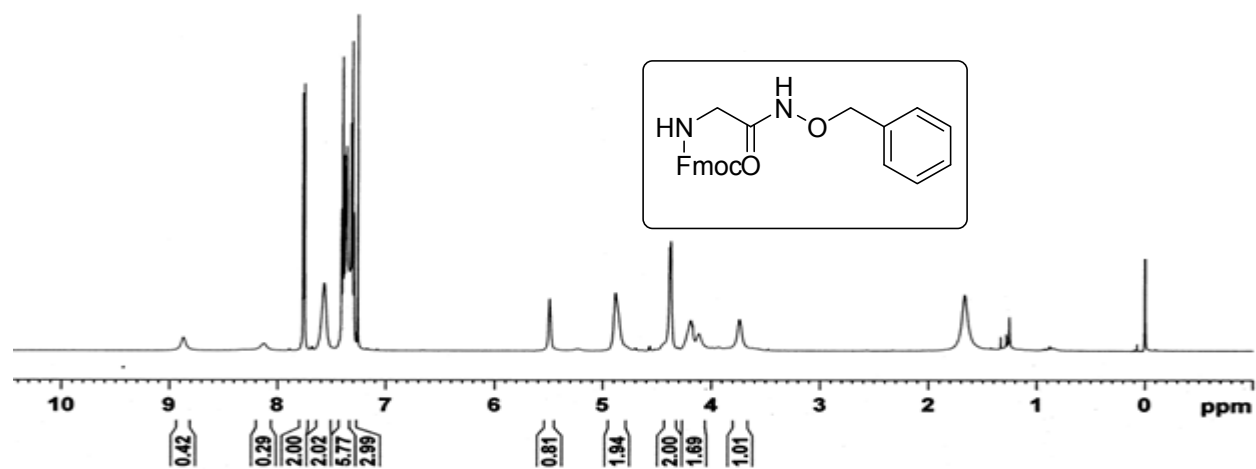

Figure S12. <sup>1</sup>H NMR spectra of Fmoc-Gly-NHOBn (entry 12, table 2)

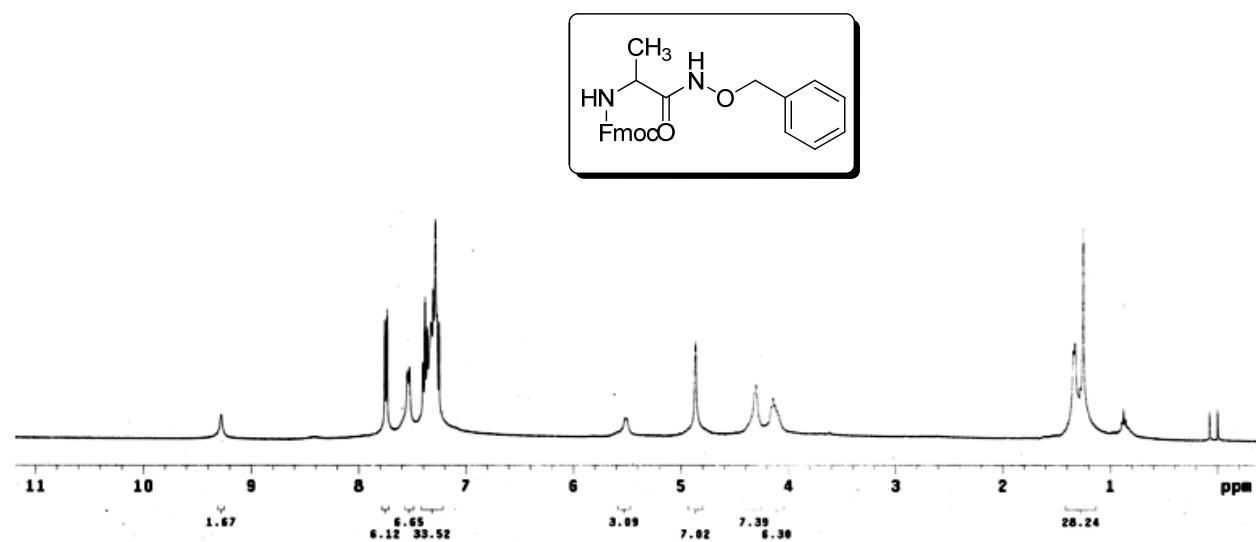

Figure S13. <sup>1</sup>H NMR spectra of Fmoc-Ala-NHOBn (entry 13, table 2)

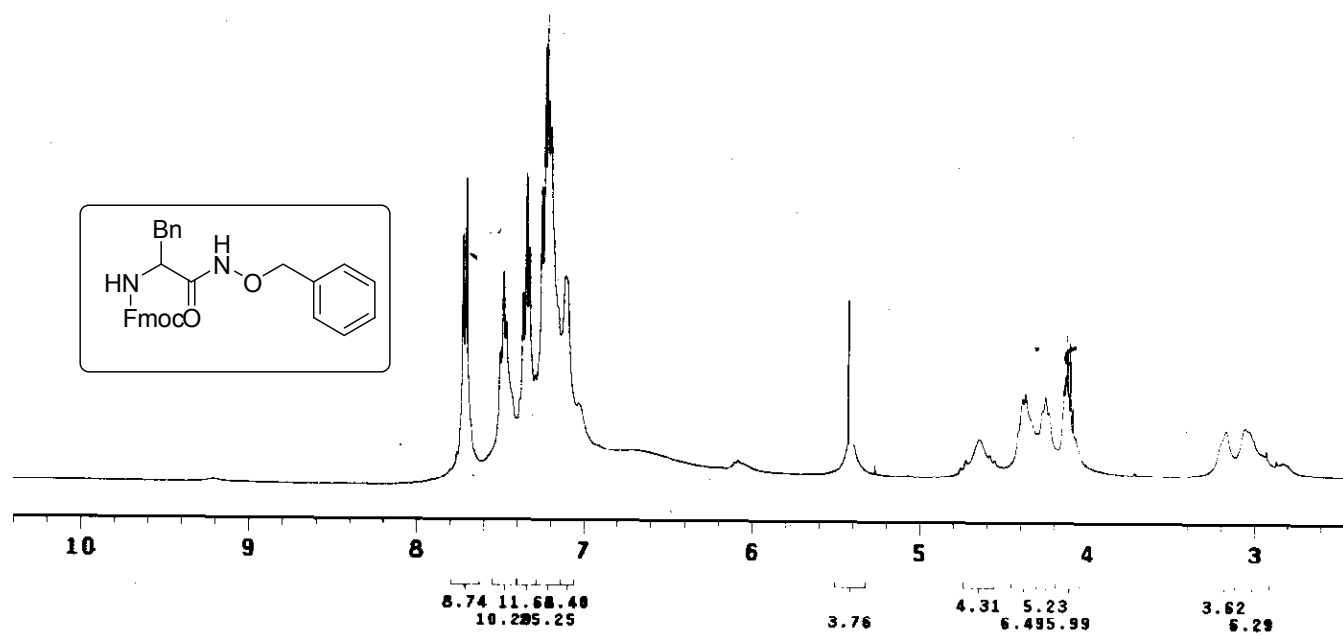

Figure S14. <sup>1</sup>H NMR Spectra of Fmoc-Phe-NHOBn (entry 14 table 2)

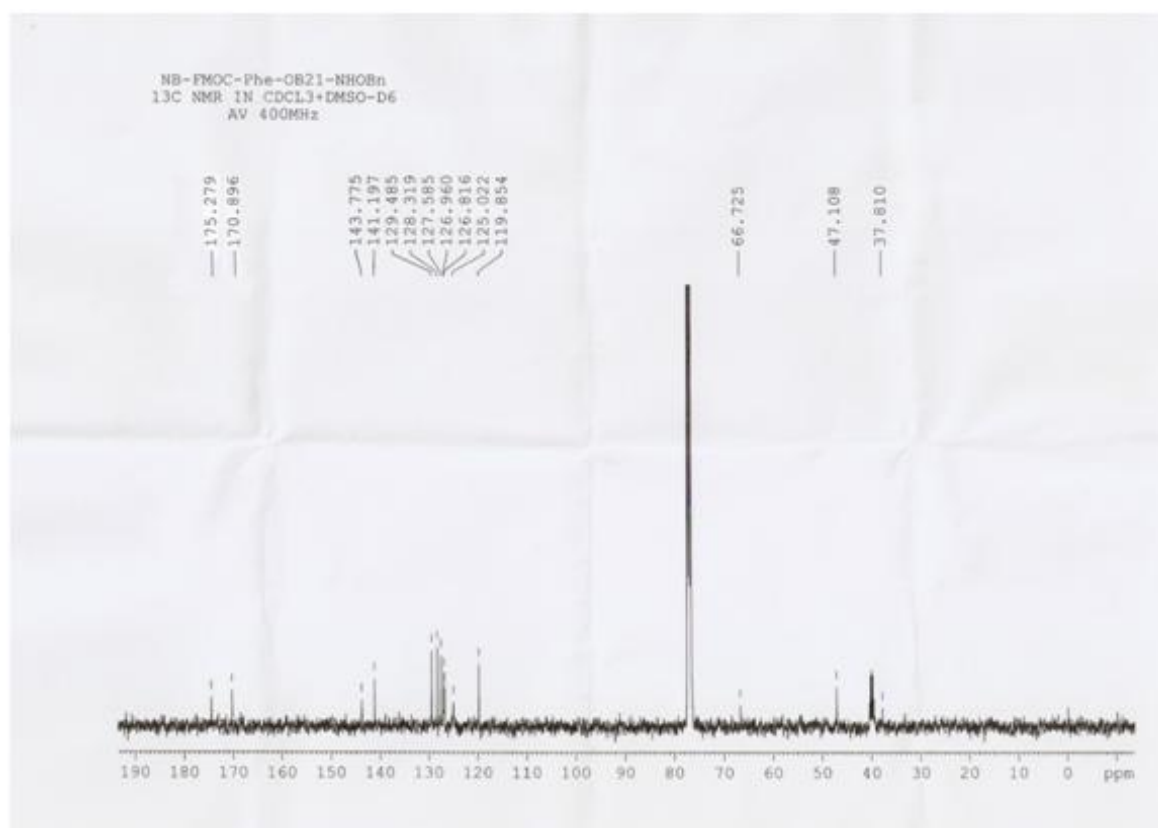

Figure S15. <sup>13</sup>C NMR spectra of Fmoc-Phe-NHOBn (entry 15, table 2)



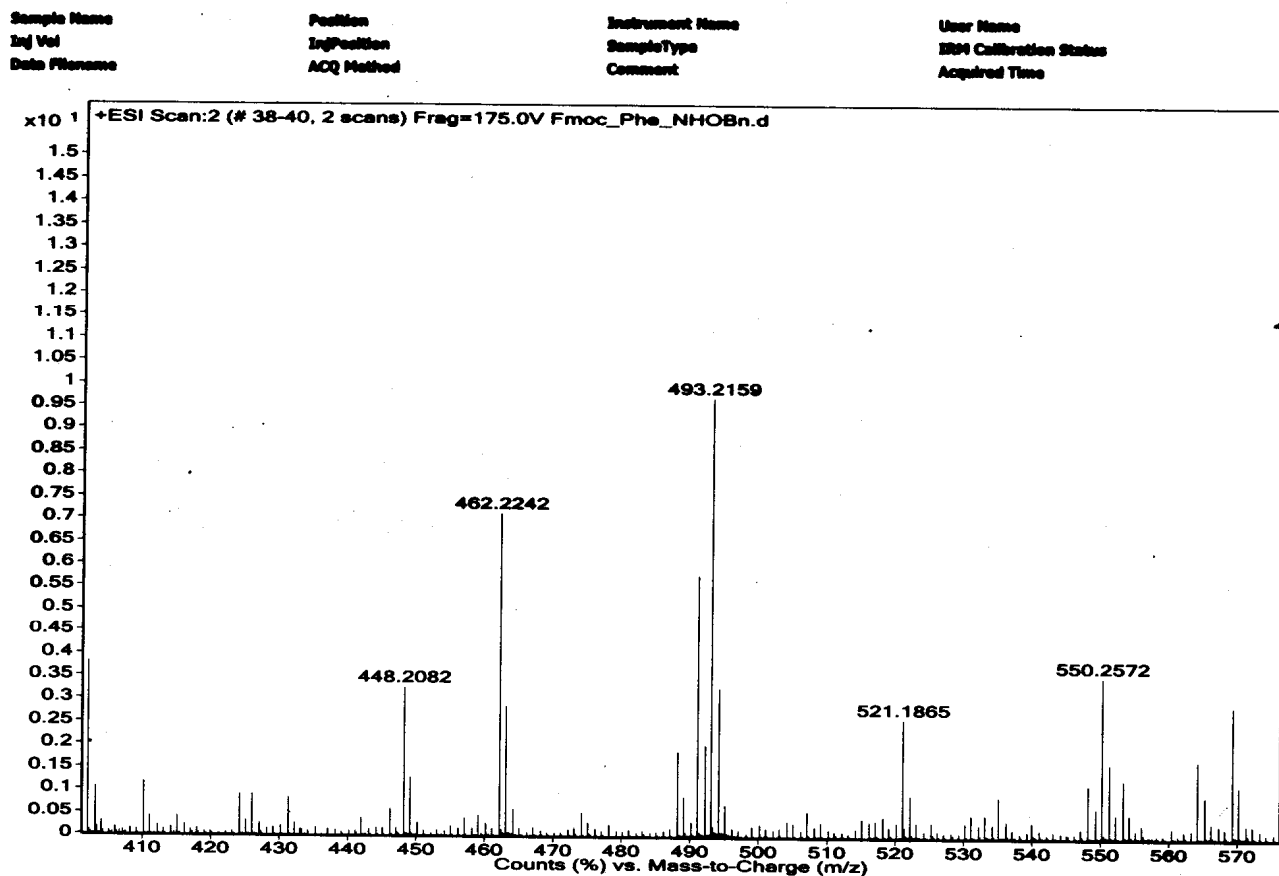

Figure S16. HRMS spectra of Fmoc-Phe-NHOBn (entry 14, table 2). Calcd. mass for  $[M+H]^+$ : 493.2127 found: 493.2159.

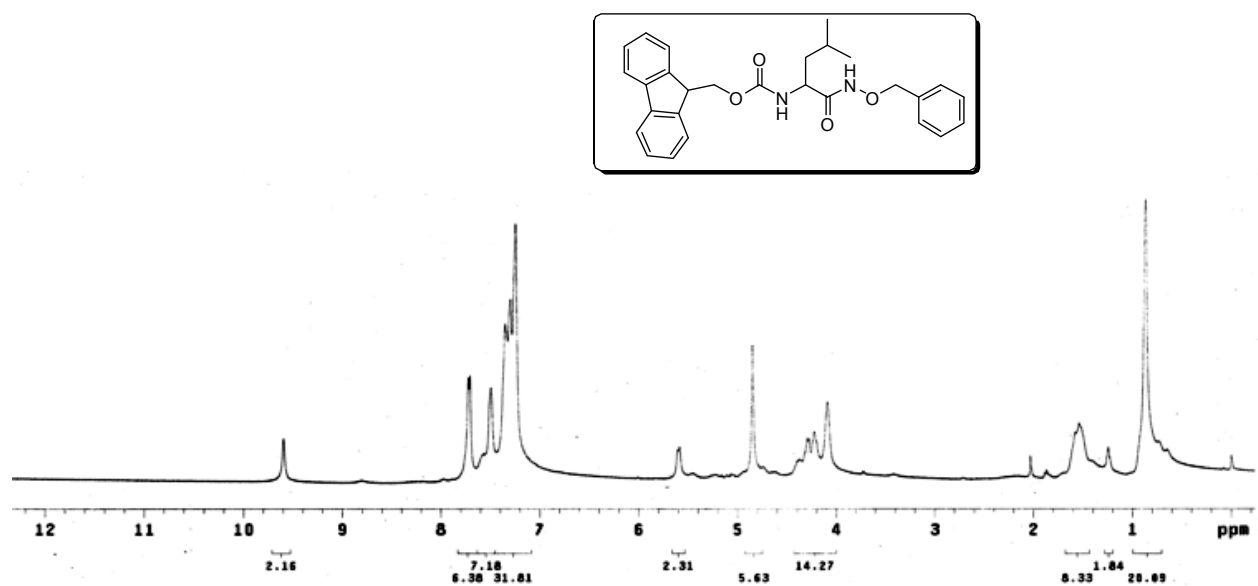

Figure S17.  $^1\text{H}$  NMR spectra of Fmoc-Leu-NHOBn (entry 15, table 2)

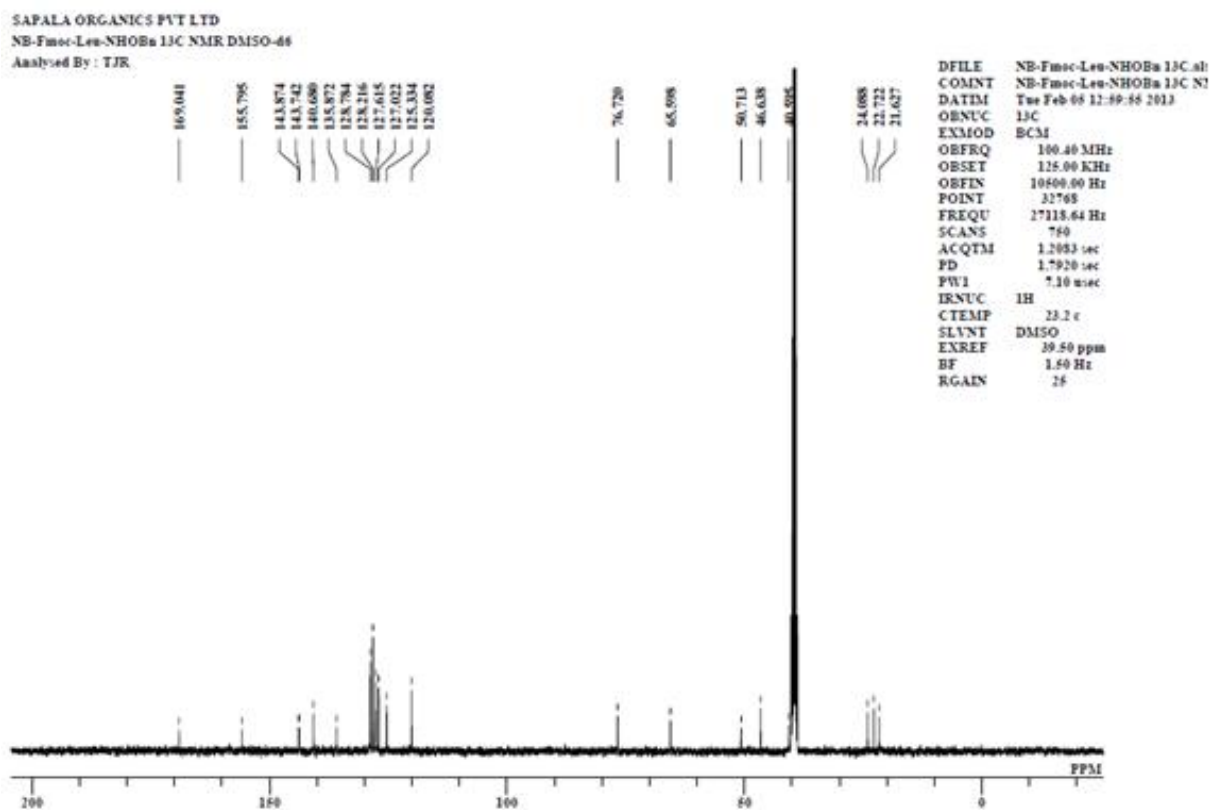

Figure S18. <sup>13</sup>C NMR spectra of Fmoc-Leu-NHOBn (entry 15, table 2)

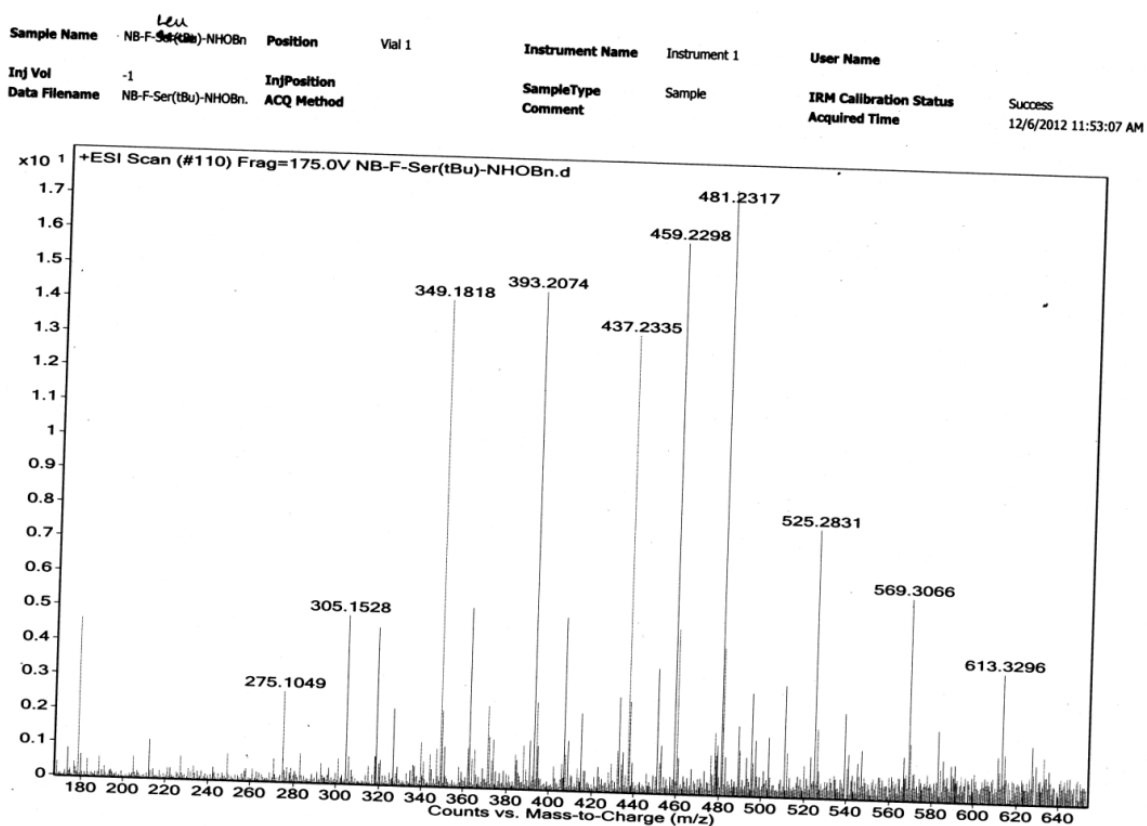

Figure S19. HRMS spectra for Fmoc-Leu-NHOBn, Calcd. mass for [M+H]<sup>+</sup>: 459.2284 found: 459.2298.

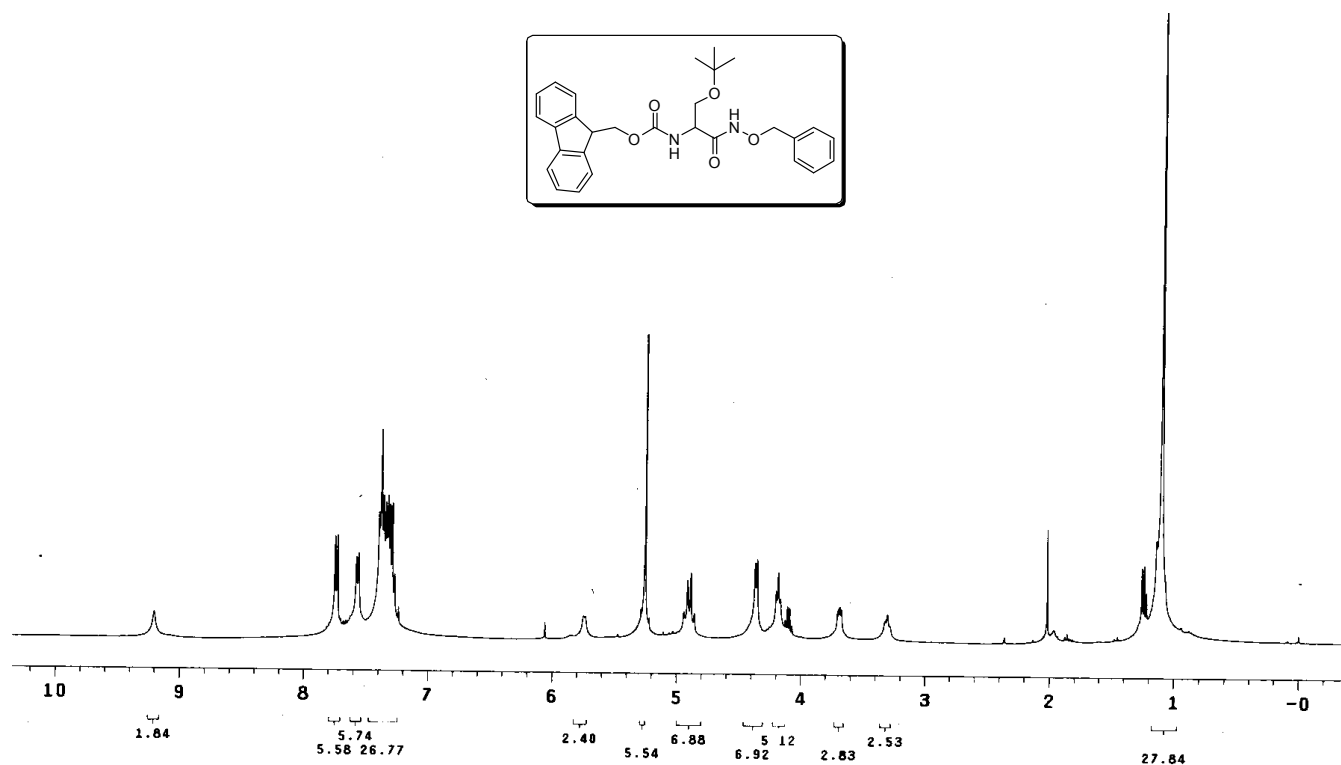

Figure S20. <sup>13</sup>C NMR spectra of Fmoc-Ser(<sup>t</sup>Bu)-NHOBn (entry 16, table 2)

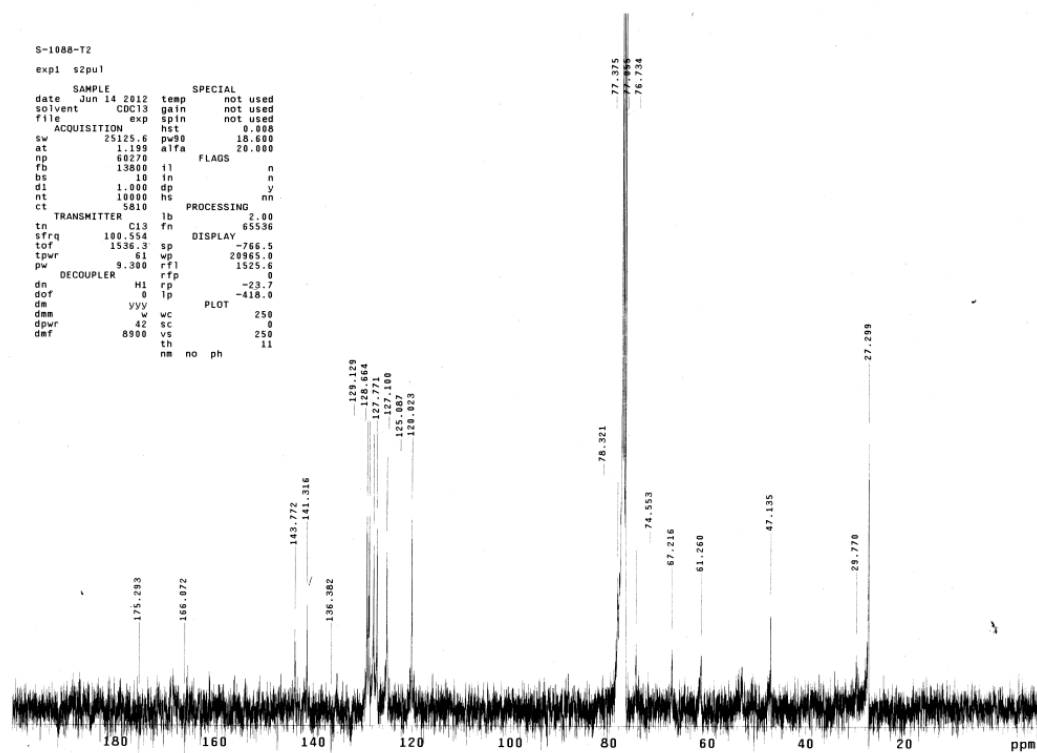

Figure S21. <sup>13</sup>C NMR spectra of Fmoc-Ser(<sup>t</sup>Bu)-NHOBn (entry 16, table 2)

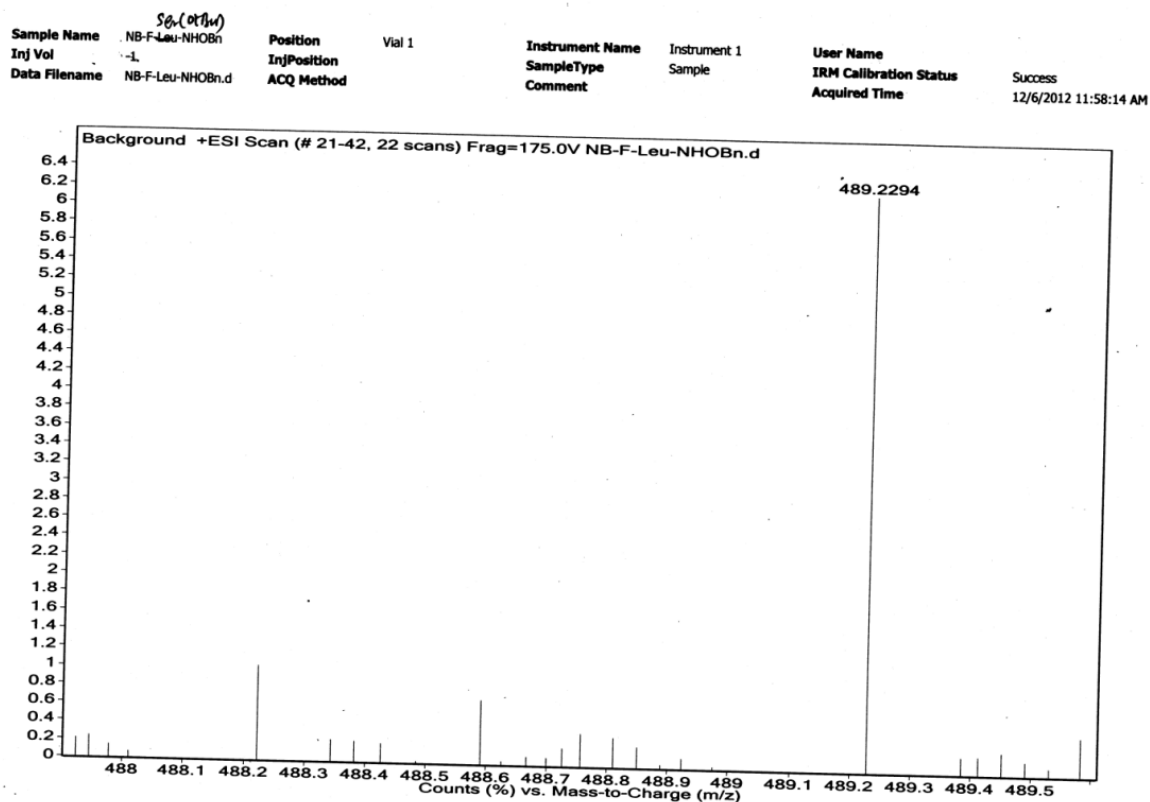

**Figure S22.** HRMS spectra of Fmoc-Ser(tBu)-NHOBn, Calcd. mass for  $[M+H]^+$ : 489.2389 found: 489.2294. (entry 16, table 2)

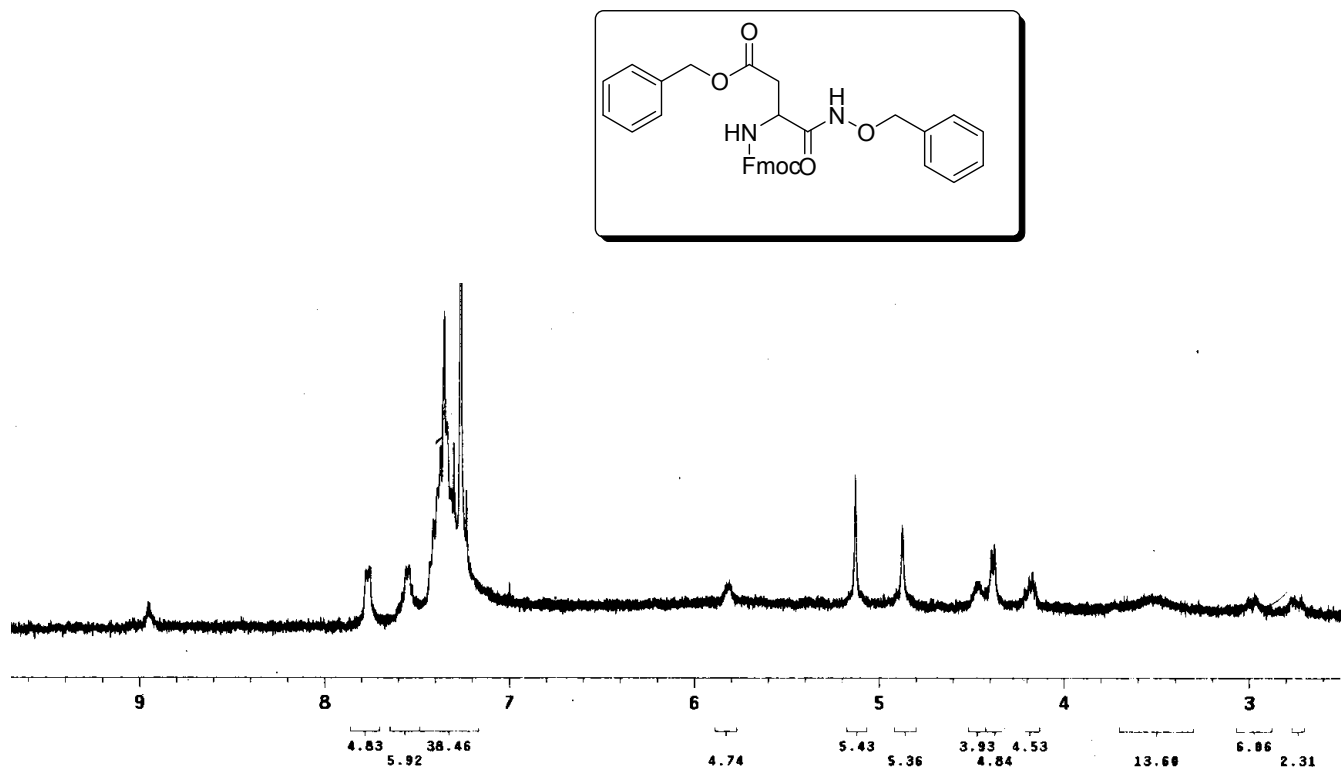

**Figure S23.**  $^1\text{H}$  NMR spectra of Fmoc-Asp(OBzl)-NHOBn (entry 17, table 2)

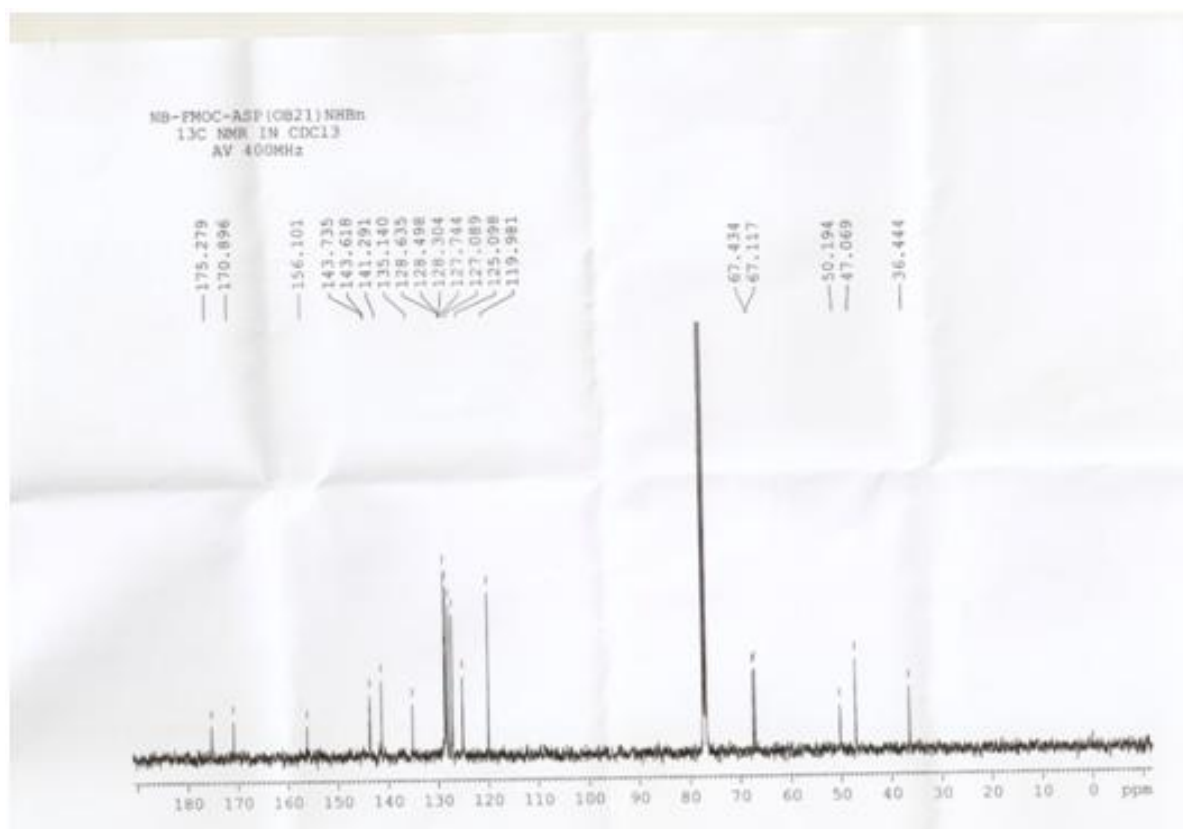

Figure S24. <sup>13</sup>C NMR spectra of Fmoc-Asp(OBzl)-NHOBn (entry 17, table 2)

| Sample Name   | NB-F-Asp(OBzl)-NHOBn | Position    | Val 1 | Instrument Name | Instrument 1 | User Name              |                       |
|---------------|----------------------|-------------|-------|-----------------|--------------|------------------------|-----------------------|
| Inj Vol       | -1                   | InjPosition |       | SampleType      | Sample       | IRM Calibration Status | Success               |
| Data Filename | NB-F-Asp(OBzl)-NHOBn | ACQ Method  |       | Comment         |              | Acquired Time          | 12/10/2012 3:22:06 PM |

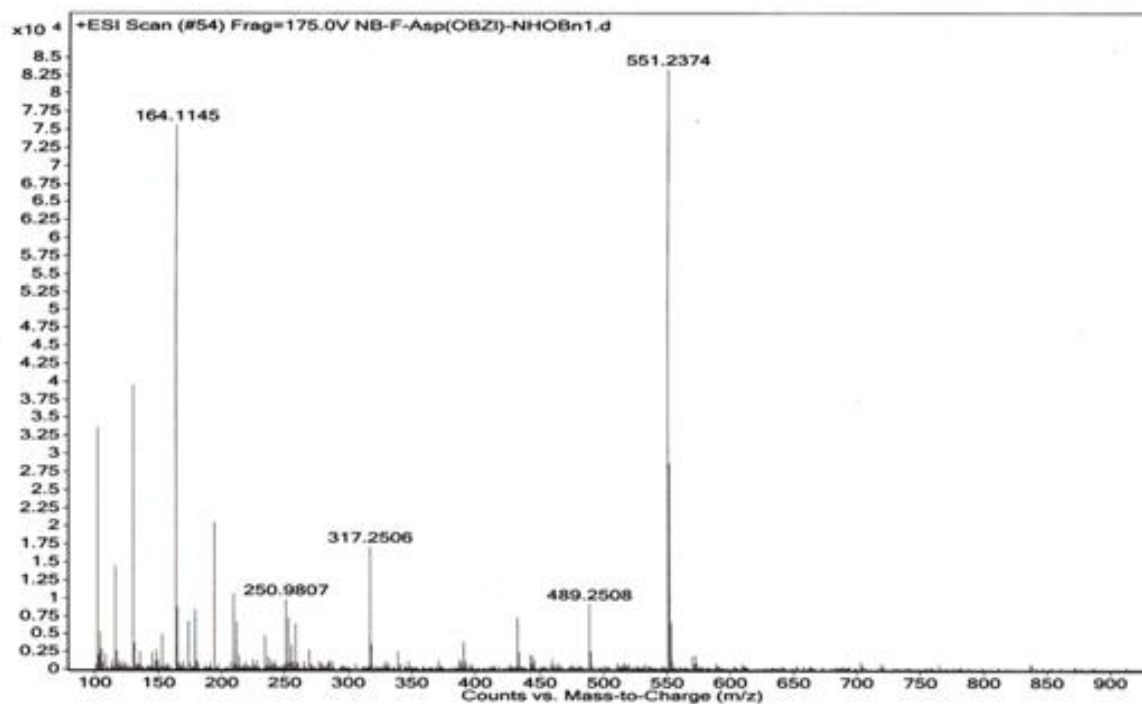

Figure S25. HRMS spectra of Fmoc-Asp(OBzl)-NHOBn Calcd. mass for  $[M+H]^+$ : 551.2182 found: 551.2374. (entry 17, table 2)

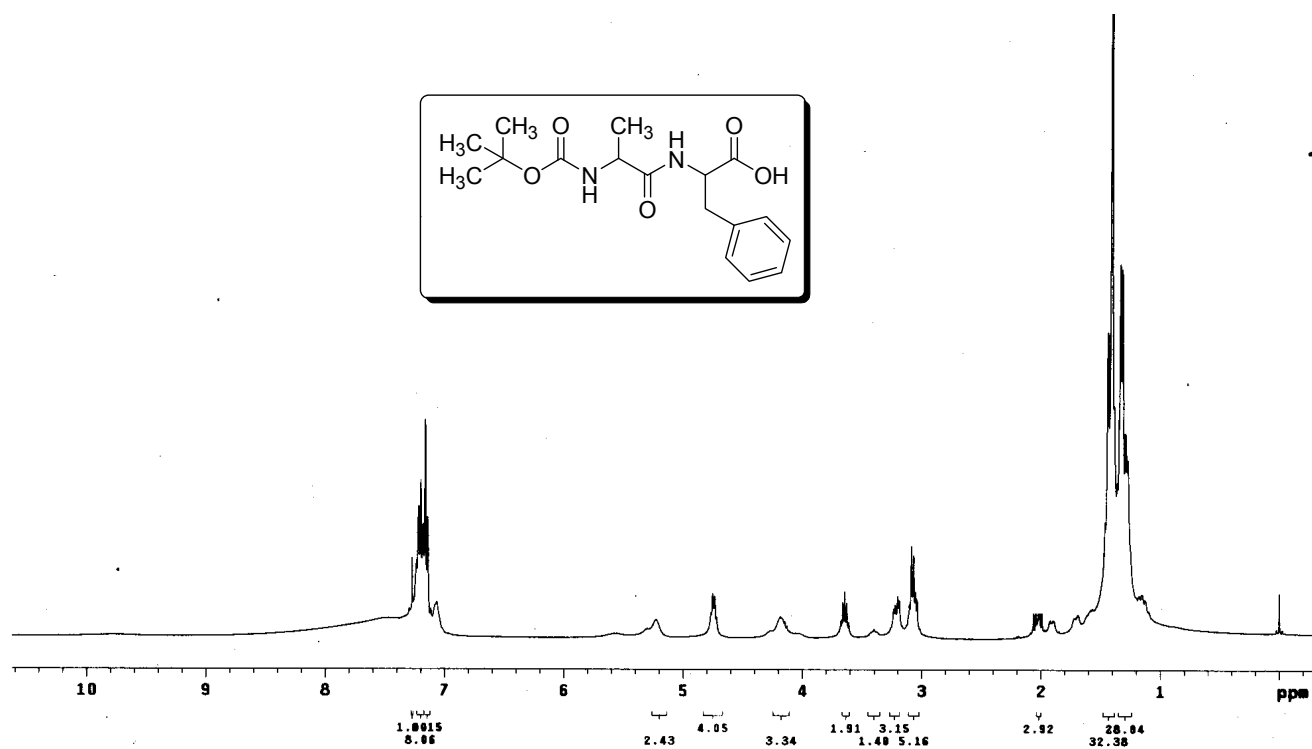

Figure S26. <sup>1</sup>H NMR spectra of Boc-Ala-Phe-OH

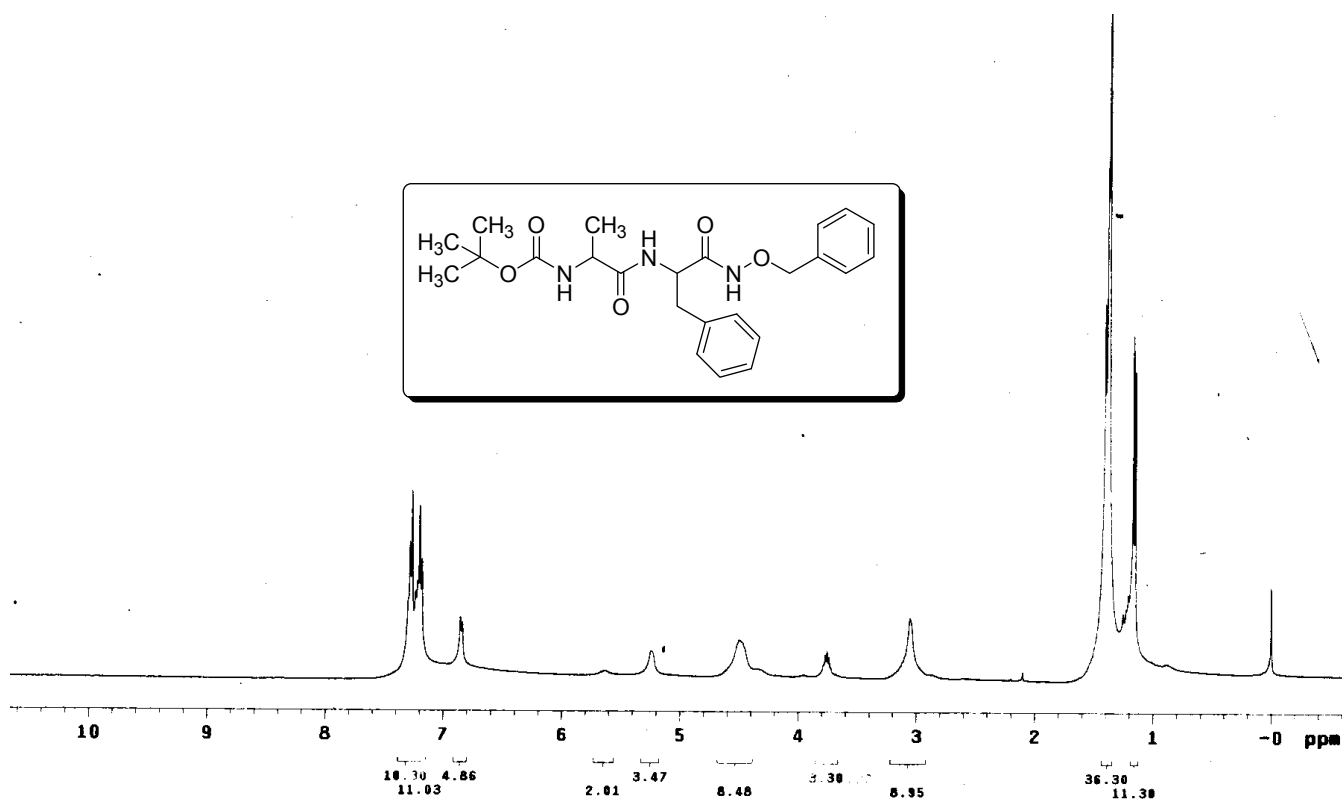

Figure S27. <sup>1</sup>H NMR spectra of Boc-Ala-Phe-NHOBn (entry 1, table 3)

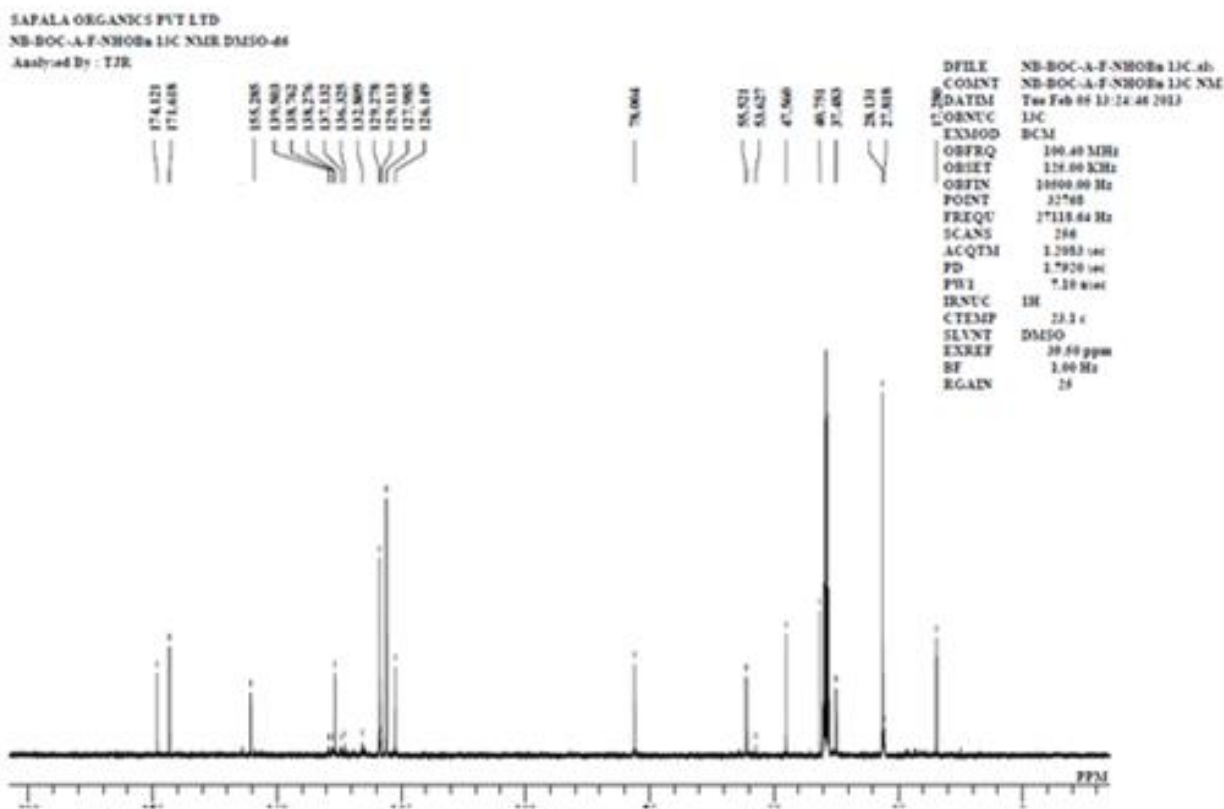

Figure S28 <sup>13</sup>C NMR spectra of Boc-Ala-Phe-NHOBn (entry 1, table 3)

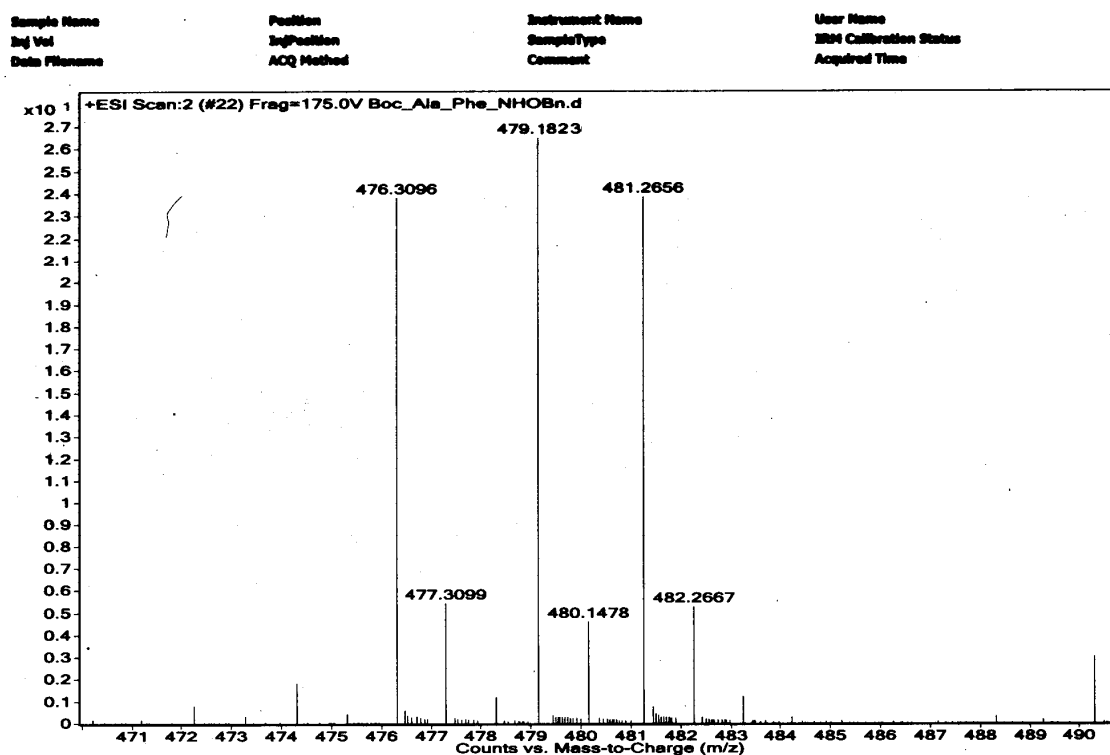

**Figure S29.** HRMS spectra of Boc-Ala-Phe-NHOBn Calcd. mass for  $[M+K]^+$  : 479.1826 found: 479.1823. (entry 1, table 3)

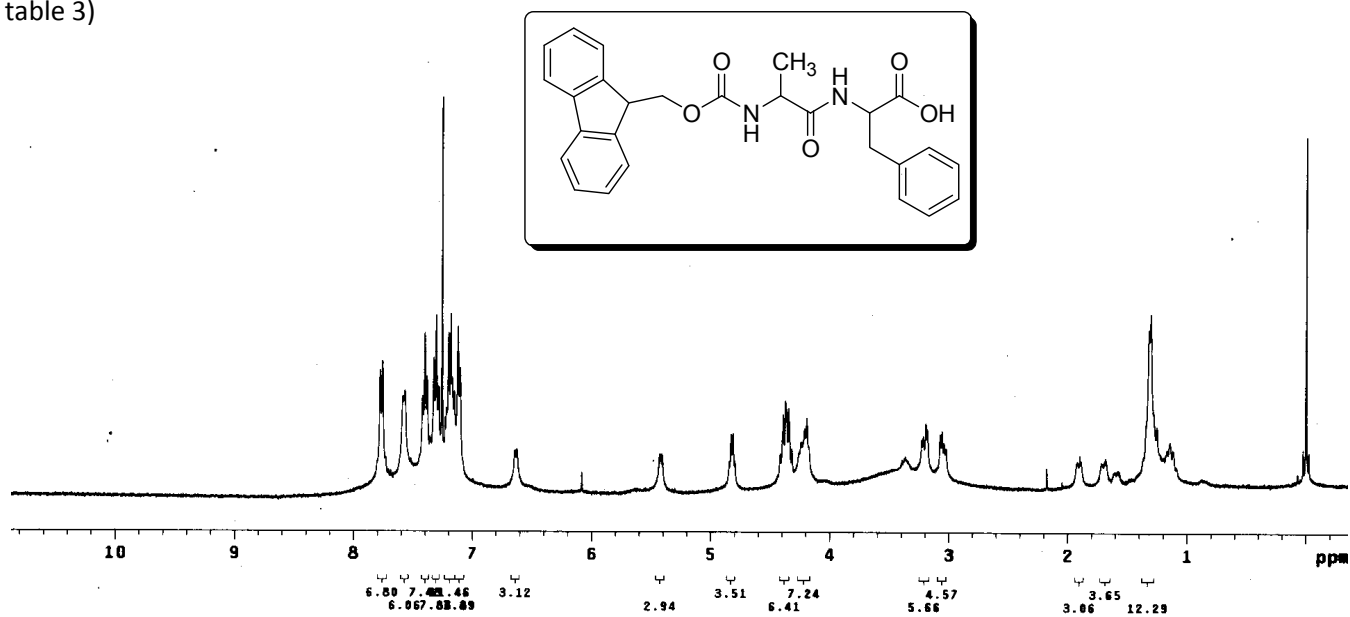

**Figure S30.** <sup>1</sup>H NMR spectra of Fmoc-Ala-Phe-OH

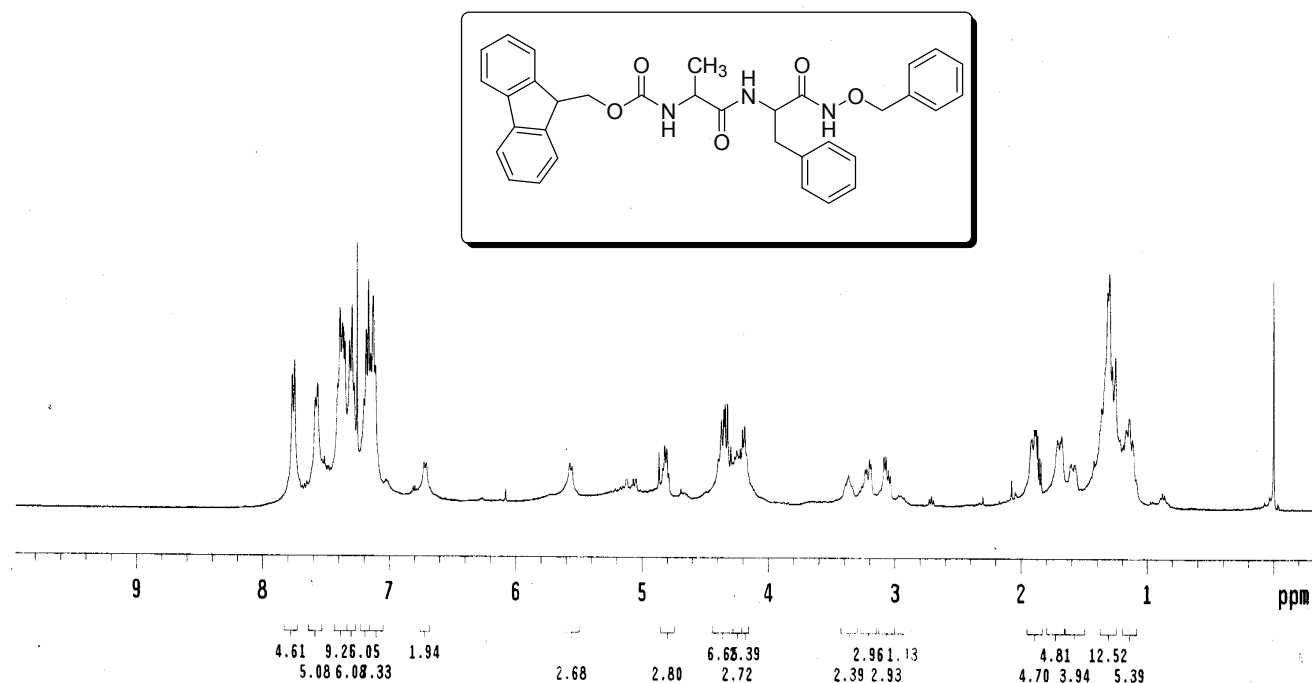

**Figure S31.** <sup>1</sup>H NMR spectra of Fmoc-Ala-Phe-NHOBn (entry 20, table 3)



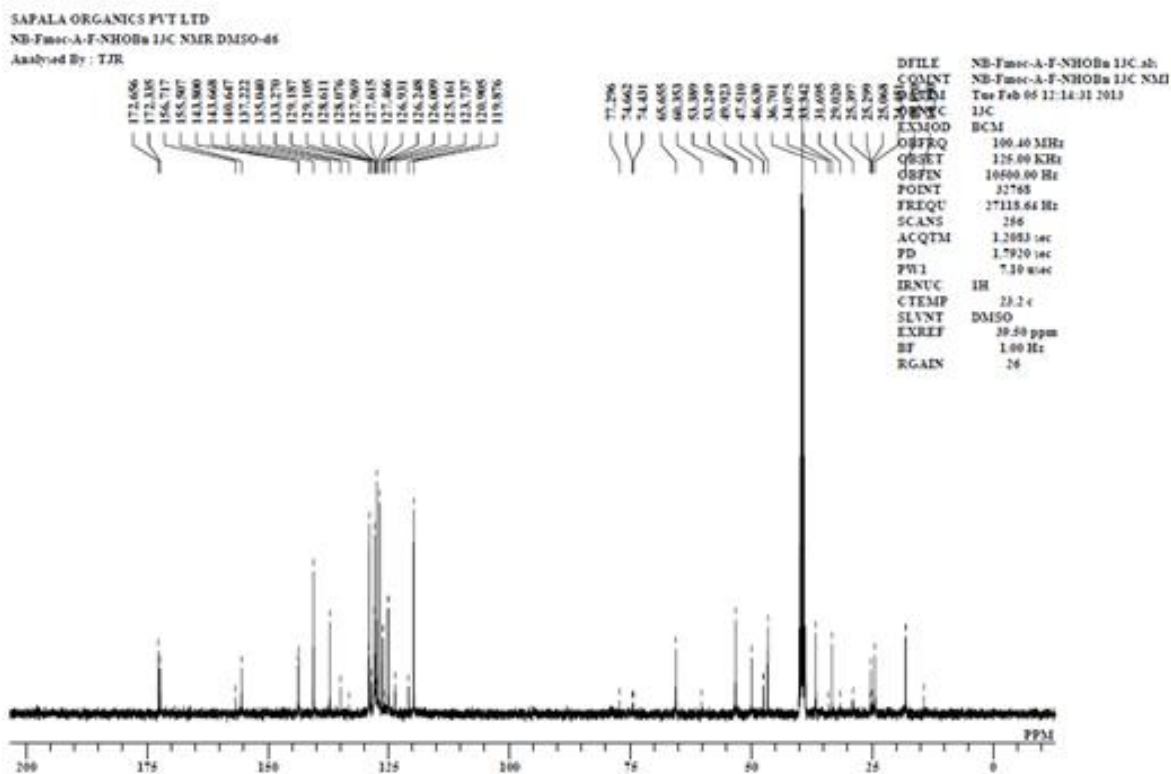

Figure S32. <sup>13</sup>C NMR spectra of Fmoc-Ala-Phe-NHOBn (entry 20, table 3)

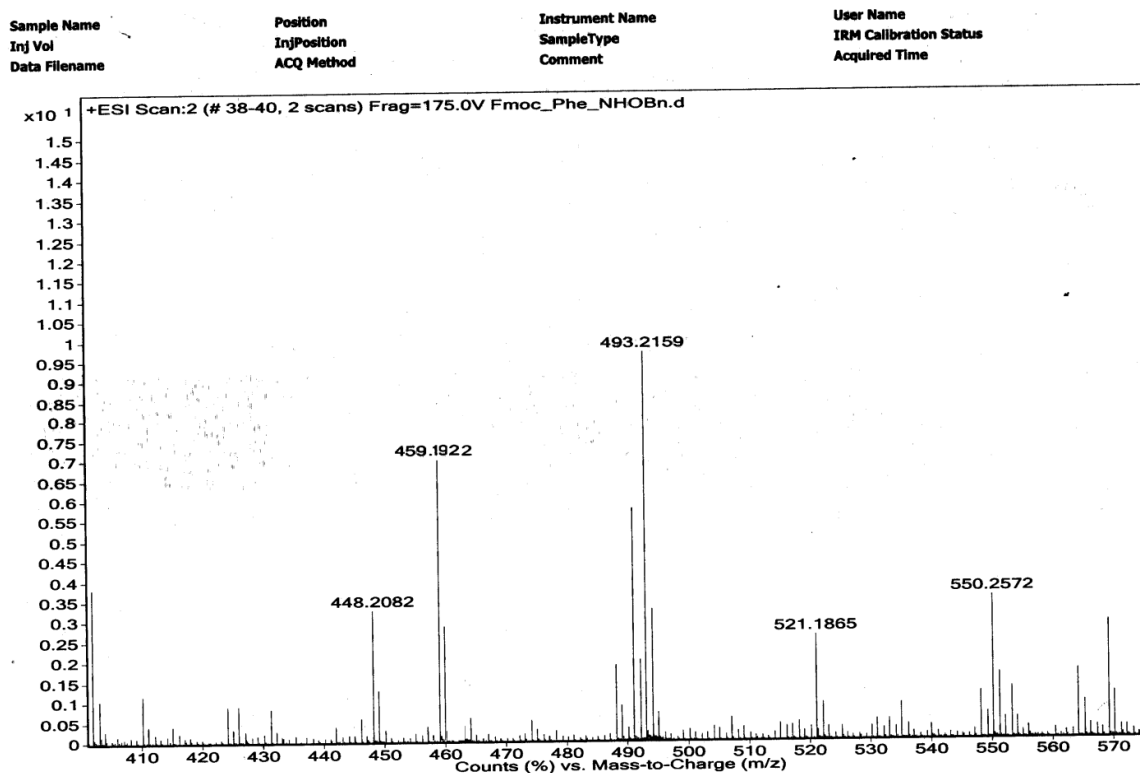

Figure S33. HRMS spectra of Fmoc-Ala-Phe-NHOBn Calcd. mass for  $[M+H]^+$  564.2498 found: 564.2456. (entry 16, table 2)

**Racemization study:**

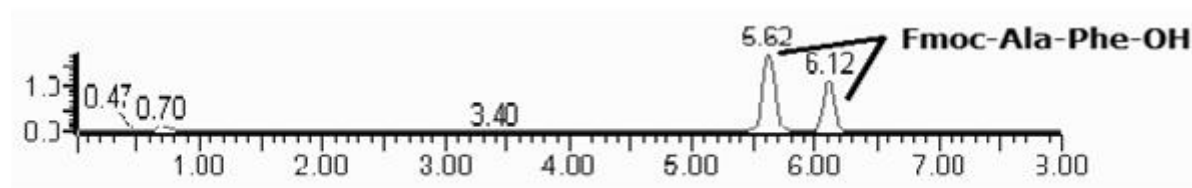

**Figure S34.** LC-MS Chromatograms for the compound Fmoc-Ala-Phe-OH using the acetonitrile and Millipore water as solvent with 0.1% formic acid.

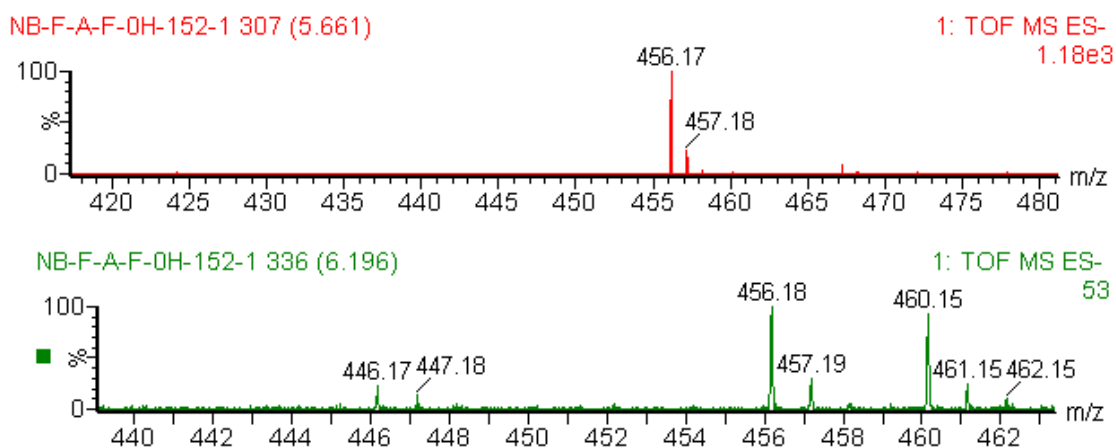

**Figure S35.** MS spectra for the compound Fmoc-Ala-Phe-OH at two different retention times (Rt 5.6, upper panel) and (Rt 6.1, lower panel). Calcd. mass for  $[M+H]^+$  457.17 found: 457.18.

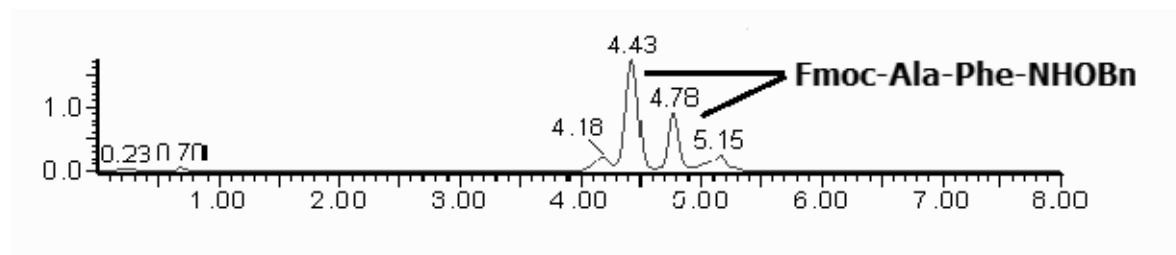

**Figure S36.** LC-MS Chromatograms for the compound Fmoc-Ala-Phe-NHOBn using the acetonitrile and Millipore water as solvent with 0.1% formic acid

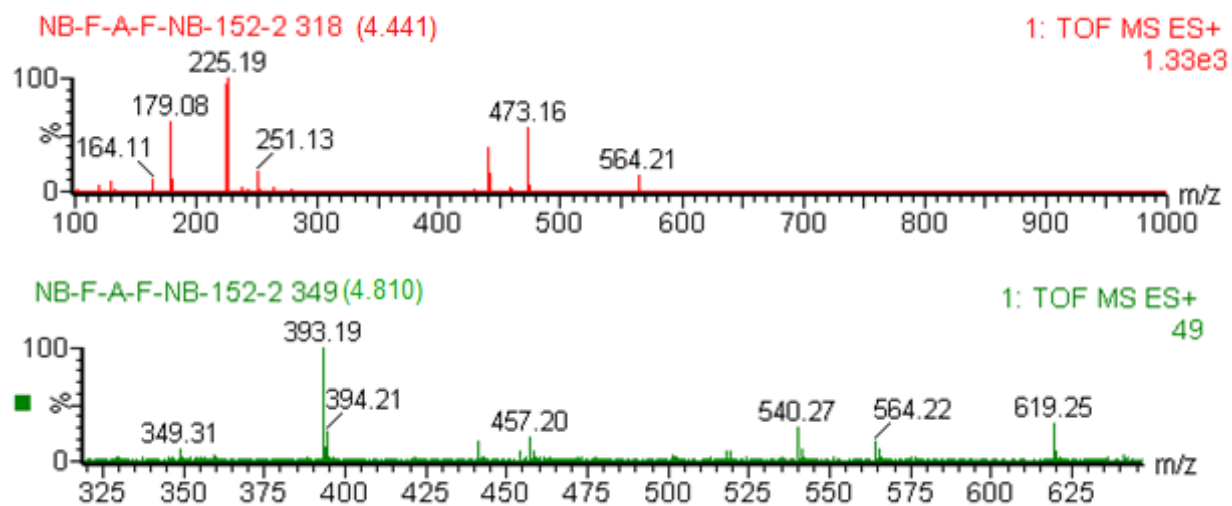

**Figure S37.** MS spectra for the compound Fmoc-Ala-Phe-NHOBn, at two different retention times (Rt 4.4, upper panel) and (Rt 4.8, lower panel). Calcd. mass for  $[M+H]^+$  564.24 found: 564.22.

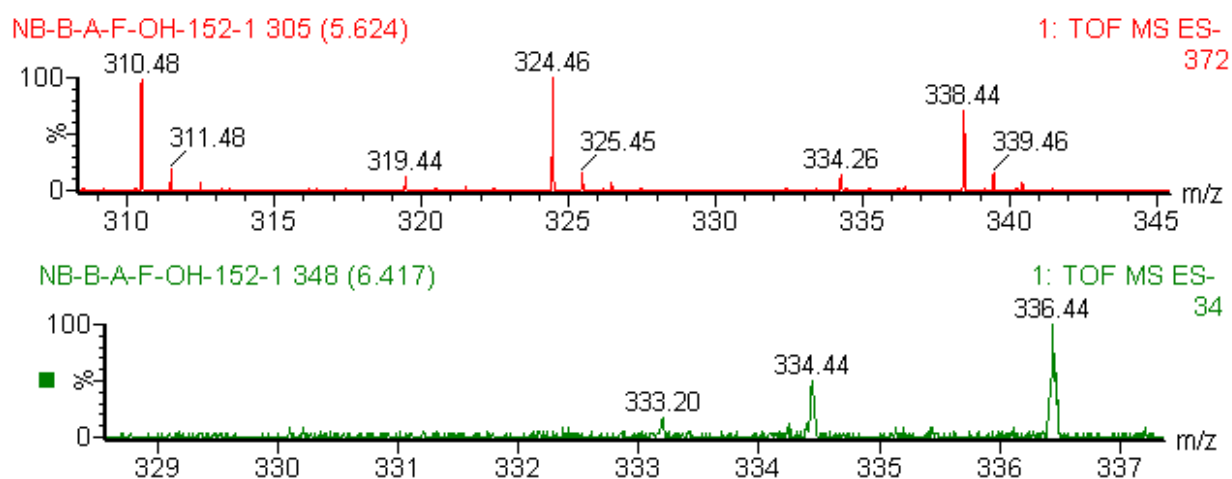

**Figure S38.** MS spectra for the compound Boc-Ala-Phe-OH, at two different retention times (Rt 5.6 min, upper panel) and (Rt 6.4 min, lower panel). Calcd. mass for  $[M+H]^+$  334.16 found: 334.26.

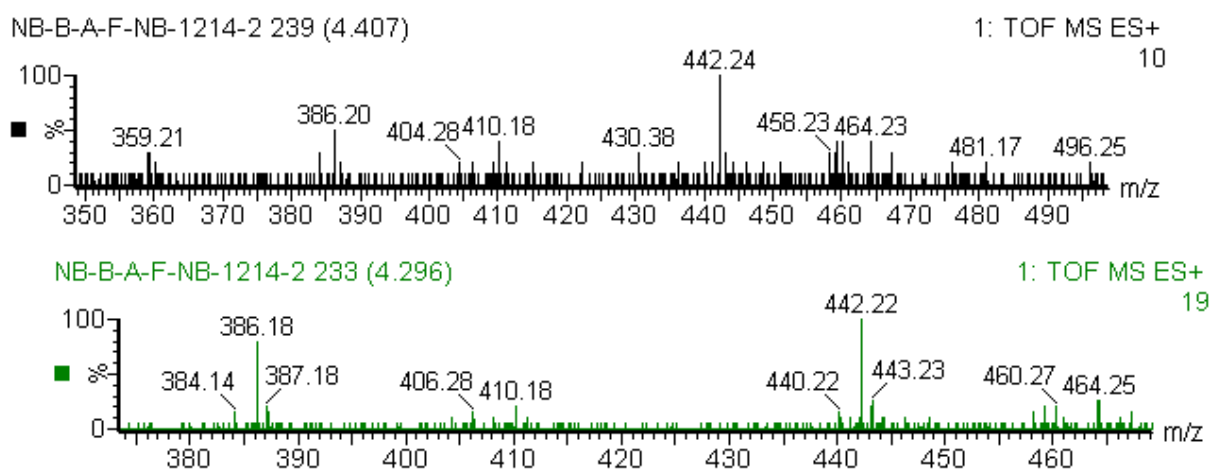

**Figure S39.** MS spectra for the compound Boc-Ala-Phe-NHOBn, at two different retention times. Calcd. mass for  $[M+H]^+$  442.23; found: 442.22.

### Mechanism study:

```
NB-FG-OH
expl stdlh
SAMPLE
date Feb 26 2013 temp not used
solvent CDCl3 gain not used
file /export/home/~ spin not used
nmr400/NB-FG-OH.f1~ hst 0.008
d pw90 19.700
a1fa 20.000
ACQUISITION
sw 6006.0 f1 FLAGS
at 1.995 f1 n
np 23964 in n
fb not used dp y
bs 10 hs nn
d1 1.000 fn PROCESSING
nt 100 not used
ct 100 DISPLAY
TRANSMITTER sp -258.0
tn H1 wp 3803.8
sfrq 399.853 rf1 966.7
tof 0 rfp 0
tpwr 57 rp 76.9
pw DECOUPLER 7.000 lp PLOT -100.0
dn C13 wc 250
dof 0 sc 0
da nnn vs 68
dam c th 14
dpwr 50 nm cdc ph
dof 15900
```

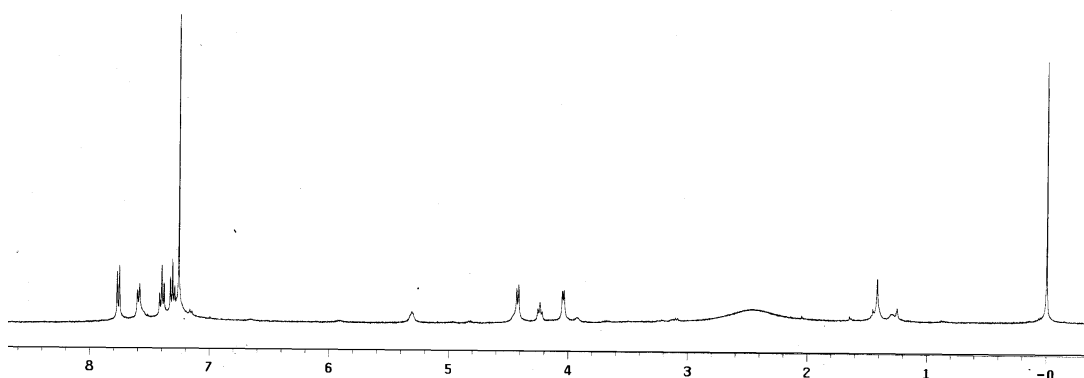

Figure S40. <sup>1</sup>H-NMR spectra of Fmoc-Gly-OH

```
NB-FG-T-2min
expl stdlh
SAMPLE
date Feb 26 2013 temp not used
solvent CDCl3 gain not used
file /export/home/~ spin not used
nmr400/NB-FG-T-2min.f1~ hst 0.008
d pw90 19.700
a1fa 20.000
ACQUISITION
sw 6006.0 f1 FLAGS
at 1.995 f1 n
np 23964 in n
fb not used dp y
bs 4 hs nn
d1 1.000 fn PROCESSING
nt 32 not used
ct 32 DISPLAY
TRANSMITTER sp -119.3
tn H1 wp 3556.4
sfrq 399.853 rf1 3868.7
tof 0 rfp 2894.9
tpwr 57 rp 85.2
pw DECOUPLER 7.000 lp PLOT -90.6
dn C13 wc 250
dof 0 sc 0
da nnn vs 2674
dam c th 11
dpwr 50 nm cdc ph
dof 15900
```

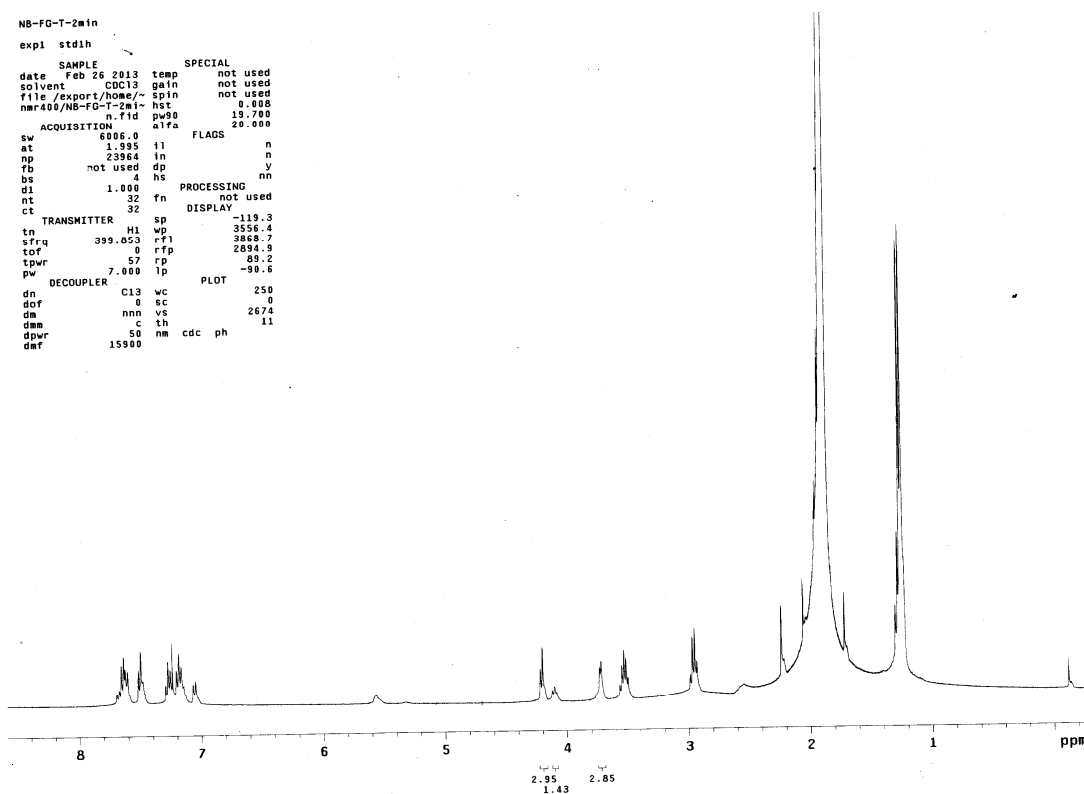

Figure S41. <sup>1</sup>H-NMR spectra of Fmoc-Gly-OH + TsOBt (after 2 min.) along with DIPEA (2 equiv.)

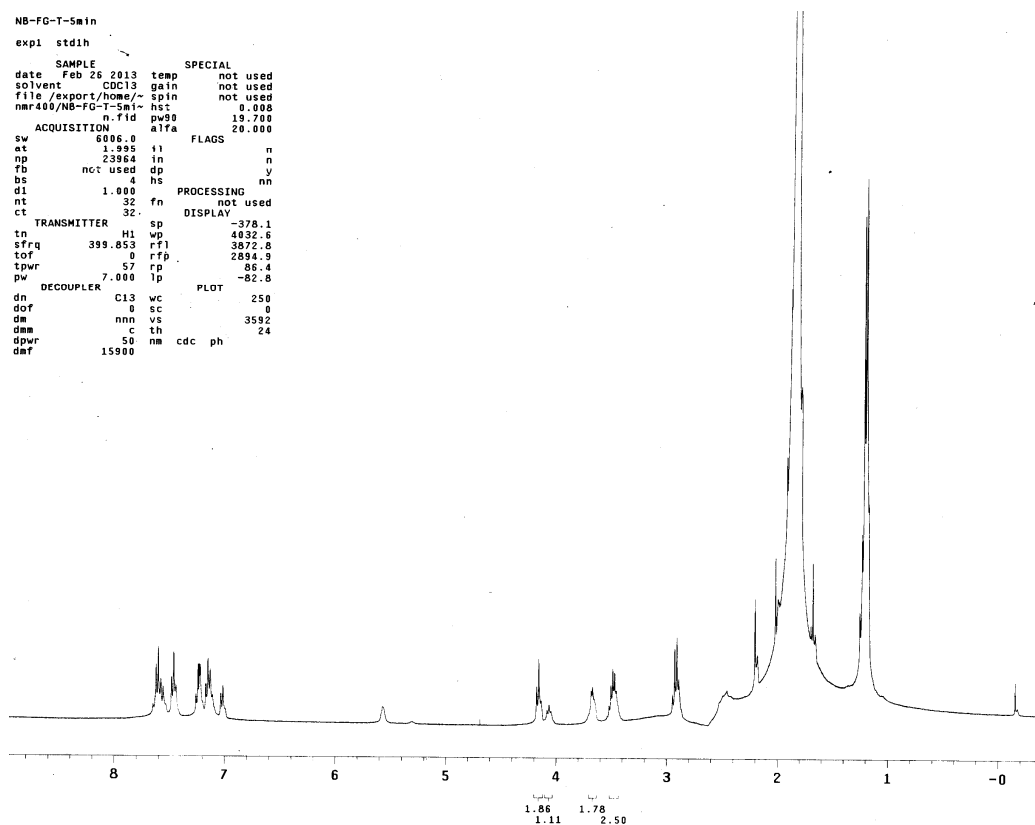

Figure S42. <sup>1</sup>H-NMR spectra of Fmoc-Gly-OH + TsOBt (after 5 min.) along with DIPEA (2 equiv.)

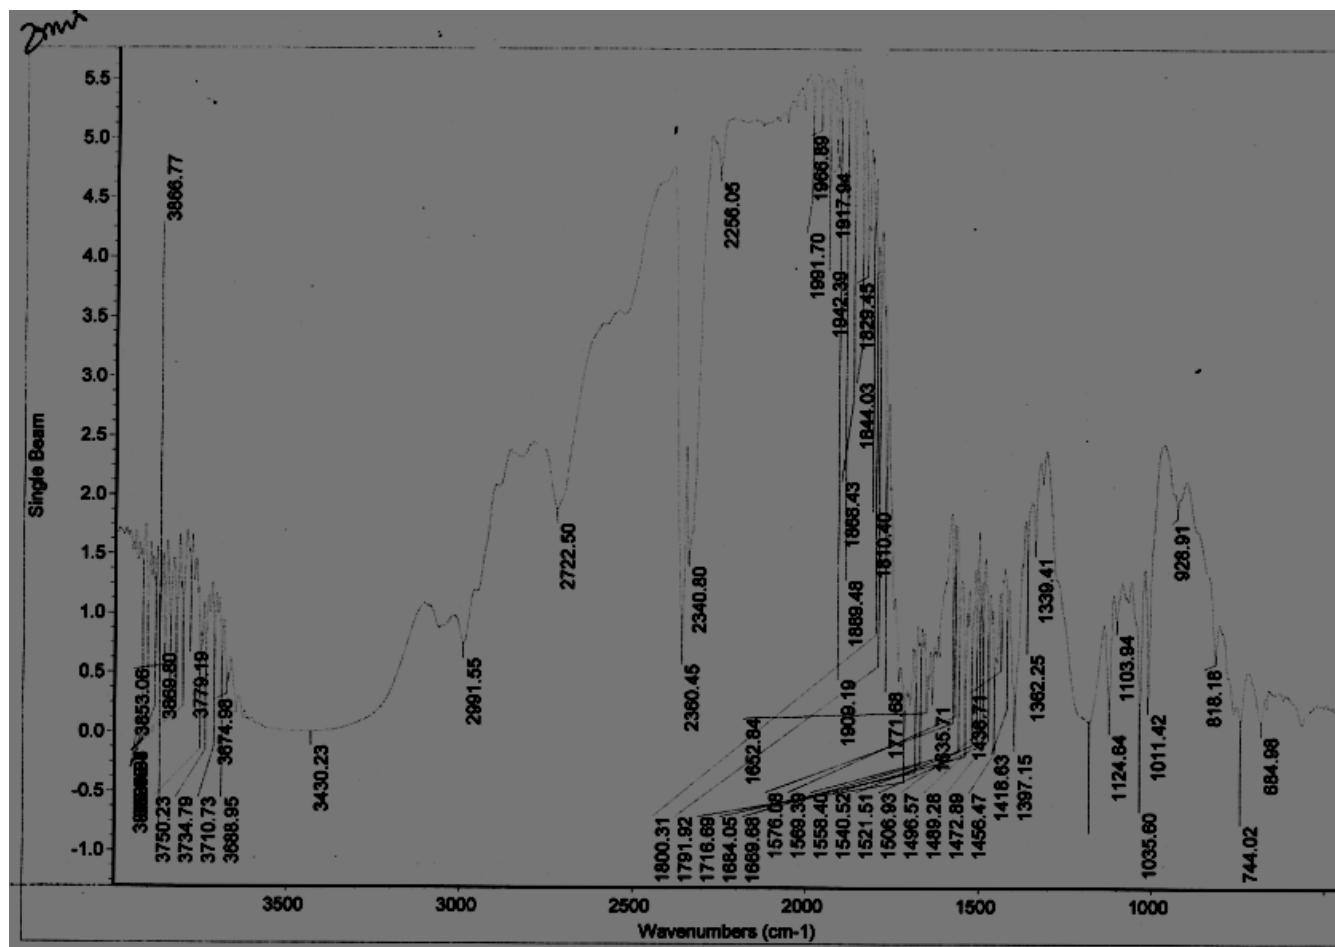

Figure S43. IR spectra of Fmoc-Gly-OH + TsOBt (after 2 min.) along with DIPEA (2 equiv.)

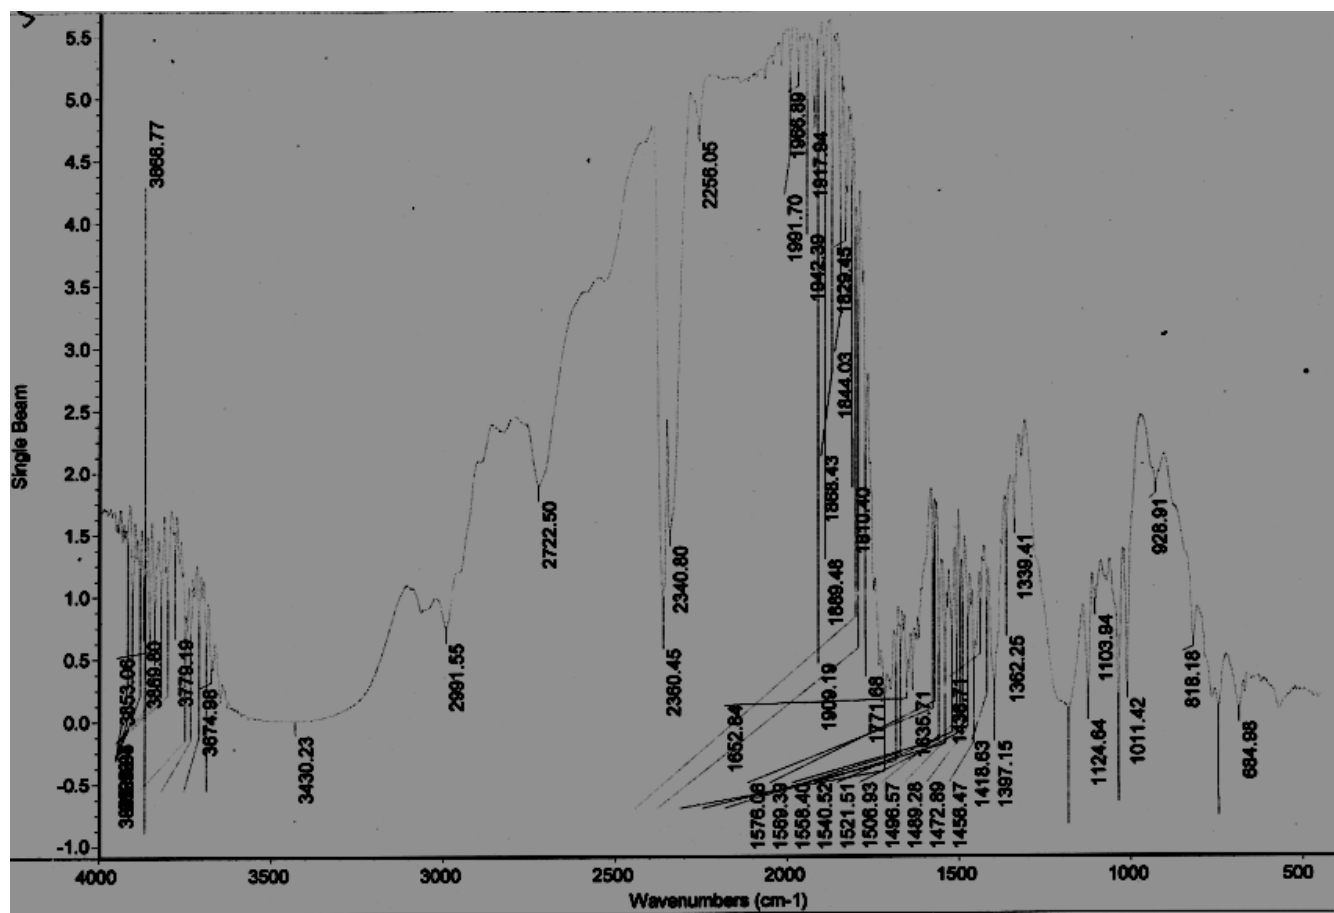

Figure S44. IR spectra of Fmoc-Gly-OH + TsOBt (after 5 min.) along with DIPEA (2 equiv.)
